# Supplementary material for: Nickel N-heterocyclic carbene-catalyzed cross-coupling reaction of aryl aldehydes with organozinc reagents to produce aryl ketones
Source: Royal Society of Chemistry journal article supplement (doi:10.1039/c5cy00876j), 2015-01-01
Supplement: c5cy00876j1.pdf [file c5cy00876j1.pdf]

# **Nickel N-heterocyclic carbene-catalyzed cross-coupling reaction of aryl aldehydes with organozinc reagents to produce aryl ketones**

Cheng Jin<sup>a</sup> Lijun Gu <sup>\*b,c</sup> and Minglong Yuan <sup>\*c</sup>

<sup>a</sup> New United Group Company Limited, Changzhou, Jiangsu, 213166, China; <sup>b</sup> Key Laboratory of Chemistry in Ethnic Medicinal Resources, State Ethnic Affairs Commission & Ministry of Education; <sup>c</sup> Engineering Research Center of Biopolymer Functional Materials of Yunnan, Yunnan Minzu University, Kunming, Yunnan, 650500, China

## **Supporting Information**

### **List of Contents**

- (A) Materials and equipment
- (B) Typical experimental procedure
- (C) Screening optimal conditions
- (D) Deuterium-labeling experiment
- (E) Analytical data
- (F) References
- (G) Spectra

## (A) Materials and equipment

Reagents were obtained commercially and used as received. Solvents were purified and dried by standard methods. Organozinc reagents (0.5M in THF) were purchased from Beijing InnoChem Science & Technology Co., Ltd. All title products were characterized by Infrared (IR), MS, <sup>1</sup>H NMR, <sup>13</sup>C NMR and High Resolution mass spectrometer (HRMS). IR spectra were reported in frequency of the absorption (cm<sup>-1</sup>). <sup>1</sup>H NMR spectra were recorded on 400 MHz in CDCl<sub>3</sub>, and <sup>13</sup>C NMR spectra were recorded on 100 MHz in CDCl<sub>3</sub> using tetramethylsilane (TMS) as an internal standard. Chemical shift values (δ) are given in ppm. Coupling constants (*J*) were measured in Hz. Mass spectra were obtained with ionization voltages of 70 eV. HRMS spectra were obtained by ESI on a TOF mass. 200-300 mesh silica gel was used for column chromatography.

## (B) Typical experimental procedure

### Typical Experimental Procedure for the Synthesis of compounds **3**:

A 10 mL oven-dried Schlenk tube was charged with **1** (0.3 mmol), **2** (0.3 mmol), **5d** (0.45 mmol), MgCl<sub>2</sub> (0.3 mmol), Ni(cod)<sub>2</sub> (8 mol %), IPr (10 mol %), 1,4-dioxane (1.5 mL), THF (1.5 mL). Then the tube was charged with argon, and was stirred at 30 °C for about 8 h. After the reaction was finished, the reaction mixture was diluted in 5 mL EtOAc. The solution was filtered through a celite pad and washed with 15-20 mL of EtOAc. The organic portion was washed with a saturated solution of NH<sub>4</sub>Cl (8 mL×2), brine (8 mL×2), dried (Na<sub>2</sub>SO<sub>4</sub>) and concentrated in vacuum, and the resulting residue was purified by silica gel column chromatography (hexane/ethyl acetate) to provide the desired products **3**.

## (C) Screening optimal conditions

**Table S1. Screening optimal conditions**

| Entry    | Ph-CHO + PhZnBr            |                 | Solvent, MgCl <sub>2</sub><br>hydrogen acceptor<br>Ligand, Ni source |            | Ph-C(=O)-Ph                            | Ph-C(=O)-OBn                          |
|----------|----------------------------|-----------------|----------------------------------------------------------------------|------------|----------------------------------------|---------------------------------------|
|          | <b>1a</b>                  | <b>2a</b>       | hydrogen acceptor                                                    | Ligand     | <b>3aa</b>                             | <b>4a</b>                             |
|          | Ni source                  | Solvent         |                                                                      |            | Yield <sup>b</sup> (%)<br><b>(3aa)</b> | Yield <sup>b</sup> (%)<br><b>(4a)</b> |
| 1        | Ni(cod) <sub>2</sub>       | 1,4-dioxane     | <b>5a</b>                                                            | IPr        | 31                                     | 38                                    |
| 2        | Ni(cod) <sub>2</sub>       | 1,4-dioxane     | <b>5b</b>                                                            | IPr        | trace                                  | 49                                    |
| 3        | Ni(cod) <sub>2</sub>       | 1,4-dioxane     | <b>5c</b>                                                            | IPr        | 51                                     | 20                                    |
| 4        | Ni(cod) <sub>2</sub>       | 1,4-dioxane     | <b>5d</b>                                                            | IPr        | 62                                     | 13                                    |
| 5        | Ni(cod) <sub>2</sub>       | toluene         | <b>5d</b>                                                            | IPr        | trace                                  | 34                                    |
| 6        | Ni(cod) <sub>2</sub>       | THF             | <b>5d</b>                                                            | IPr        | 44                                     | 28                                    |
| 7        | Ni(cod) <sub>2</sub>       | EtOEt           | <b>5d</b>                                                            | IPr        | 12                                     | 19                                    |
| <b>8</b> | <b>Ni(cod)<sub>2</sub></b> | <b>THF/1,4-</b> | <b>5d</b>                                                            | <b>IPr</b> | <b>78</b>                              | <b>trace</b>                          |

| <b>dioxane</b>  |                                                   |                 |           |                  |       |    |
|-----------------|---------------------------------------------------|-----------------|-----------|------------------|-------|----|
| 9               | NiI <sub>2</sub> (PPh <sub>3</sub> ) <sub>2</sub> | THF/1,4-dioxane | <b>5d</b> | IPr              | trace | 15 |
| 10              | NiCl <sub>2</sub> (dppe) <sub>2</sub>             | THF/1,4-dioxane | <b>5d</b> | IPr              | 9     | 33 |
| 11              | Ni(PPh <sub>3</sub> ) <sub>4</sub>                | THF/1,4-dioxane | <b>5d</b> | IPr              | 24    | 36 |
| 12              | NiCl <sub>2</sub>                                 | THF/1,4-dioxane | <b>5d</b> | IPr              | trace | 14 |
| 13              | Ni(cod) <sub>2</sub>                              | THF/1,4-dioxane | <b>5d</b> | PCy <sub>3</sub> | trace | 21 |
| 14              | Ni(cod) <sub>2</sub>                              | THF/1,4-dioxane | <b>5d</b> | ItBu             | 32    | 10 |
| 15              | Ni(cod) <sub>2</sub>                              | THF/1,4-dioxane | <b>5d</b> | SIPr             | 41    | 17 |
| 16              | none                                              | THF/1,4-dioxane | <b>5d</b> | IPr              | 0     | 0  |
| 17 <sup>c</sup> | Ni(cod) <sub>2</sub>                              | THF/1,4-dioxane | <b>5d</b> | IPr              | 46    | 21 |

<sup>a</sup> Reaction conditions: **1a** (0.3 mmol), **2a** (0.3 mmol), MgCl<sub>2</sub> (0.3 mmol), hydrogen acceptor (1.5 equiv), Ni source (8 mol %), ligands (10 mol %), solvent (3 mL), 30 °C, in Ar atmosphere for 8 h. <sup>b</sup> Isolated yield. <sup>c</sup> Without MgCl<sub>2</sub>. cod = 1,5-cyclooctadiene, dppe = 1,2-bis(diphenylphosphino)ethane, IPr = 1,3-bis(2,6-diisopropylphenyl)imidazole-2-ylidene, ItBu = 1,3-Di-tert-butylimidazol-2-ylidene, SIPr = 1,3-bis(2,6-di-isopropylphenyl)imidazolidin-2-ylidene.

#### hydrogen acceptor

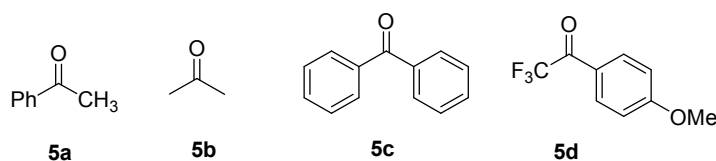

#### (D) Deuterium-labeling experiment

A 10 mL oven-dried Schlenk tube was charged with **1a** (0.2 mmol), **1a-d<sub>6</sub>** (0.2 mmol), **2a** (0.4 mmol), MgCl<sub>2</sub> (0.4 mmol), **5d** (0.6 mmol), Ni(cod)<sub>2</sub> (15 mol %), IPr (20 mol %), 1,4-dioxane (2.0 mL), THF (2.0 mL). Then the tube was charged with argon, and was stirred at 30 °C for about 8 h. After the reaction was finished, the reaction mixture was diluted in 10 mL EtOAc. The solution was filtered through a celite pad and washed with 30 mL of EtOAc. The organic portion was washed with a saturated solution of NH<sub>4</sub>Cl (8 mL×2), bine (8 mL×2), dried (Na<sub>2</sub>SO<sub>4</sub>) and concentrated in vacuum, and the resulting residue was purified by silica gel column chromatography (hexane/ethyl acetate) to provide the desired products **3aa** and **3aa-d<sub>5</sub>** in a ratio of 5.9:1 (determined by HRMS).

The HRMS spectra of **3aa** and **3aa-d<sub>5</sub>**

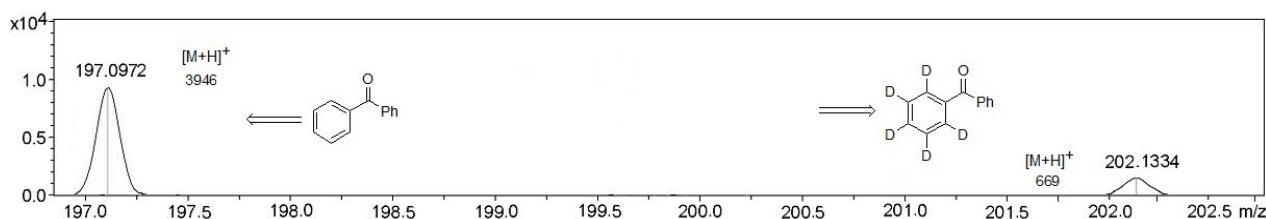

### (E) Analytical data

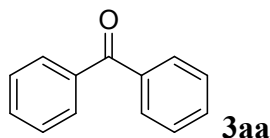

#### Benzophenone (3aa): <sup>1</sup>

<sup>1</sup>H NMR (400 MHz, CDCl<sub>3</sub>)  $\delta$ : 7.83 (dd,  $J = 8.0$  Hz,  $J = 1.6$  Hz, 4H), 7.61-7.56 (m, 2H), 7.51-7.45 (m, 4H); <sup>13</sup>C NMR (100 MHz, CDCl<sub>3</sub>)  $\delta$ : 196.7, 137.8, 132.5, 130.2, 128.4; IR (neat cm<sup>-1</sup>): 1660 (C=O); LRMS (EI 70 ev)  $m/z$  (%): 182 (M<sup>+</sup>, 100); HRMS  $m/z$  (ESI) calcd for C<sub>13</sub>H<sub>11</sub>O (M+H)<sup>+</sup> 183.0804, found 183.0801.

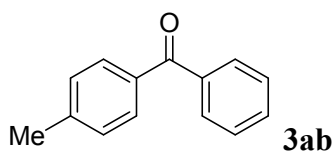

#### Phenyl(p-tolyl)methanone (3ab): <sup>1</sup>

<sup>1</sup>H NMR (400 MHz, CDCl<sub>3</sub>)  $\delta$ : 7.79 (d,  $J = 7.2$  Hz, 2H), 7.73 (d,  $J = 8.0$  Hz, 2H), 7.59 (t,  $J = 7.4$  Hz, 1H), 7.48 (t,  $J = 7.6$  Hz, 2H), 7.28 (d,  $J = 8.0$  Hz, 2H), 2.43 (s, 3H); <sup>13</sup>C NMR (100 MHz, CDCl<sub>3</sub>)  $\delta$ : 196.4, 143.2, 137.9, 134.8, 132.1, 130.2, 129.8, 128.9, 128.1, 21.6; IR (neat cm<sup>-1</sup>): 1658 (C=O); LRMS (EI 70 ev)  $m/z$  (%): 196 (M<sup>+</sup>, 100); HRMS  $m/z$  (ESI) calcd for C<sub>14</sub>H<sub>13</sub>O (M+H)<sup>+</sup> 197.0960, found 197.0963.

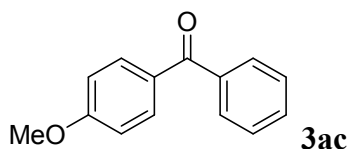

#### (4-Methoxyphenyl)(phenyl)methanone (3ac): <sup>1</sup>

<sup>1</sup>H NMR (400 MHz, CDCl<sub>3</sub>)  $\delta$ : 7.80 (d,  $J = 8.4$  Hz, 2H), 7.73 (d,  $J = 8.0$  Hz, 2H), 7.51-7.45 (m, 3H), 6.96 (d,  $J = 8.4$  Hz, 2H), 3.91 (s, 3H); <sup>13</sup>C NMR (100 MHz, CDCl<sub>3</sub>)  $\delta$ : 197.1, 163.2, 138.2, 132.4, 131.7, 130.0, 129.5, 128.2, 113.6, 55.8; IR (neat cm<sup>-1</sup>): 1652 (C=O); LRMS (EI 70 ev)  $m/z$  (%): 212 (M<sup>+</sup>, 100); HRMS  $m/z$  (ESI) calcd for C<sub>14</sub>H<sub>13</sub>O<sub>2</sub> (M+H)<sup>+</sup> 213.0909, found 213.0913.

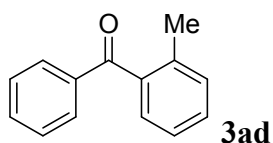

**Phenyl(o-tolyl)methanone (3ad):** <sup>1</sup>

<sup>1</sup>H NMR (400 MHz, CDCl<sub>3</sub>)  $\delta$ : 7.74 (d,  $J$  = 7.2 Hz, 2H), 7.54-7.50 (m, 1H), 7.43-7.36 (m, 2H), 7.33-7.26 (m, 1H), 7.25-7.20 (m, 3H); 2.33 (s, 3H); <sup>13</sup>C NMR (100 MHz, CDCl<sub>3</sub>)  $\delta$ : 198.5, 138.8, 138.1, 137.0, 133.5, 131.7, 130.6, 130.3, 129.0, 128.8, 125.4, 20.4; IR (neat cm<sup>-1</sup>): 1647 (C=O); LRMS (EI 70 ev)  $m/z$  (%): 196 (M<sup>+</sup>, 100); HRMS  $m/z$  (ESI) calcd for C<sub>14</sub>H<sub>13</sub>O (M+H)<sup>+</sup> 197.0960, found 197.0961.

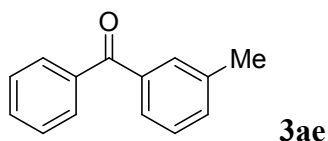

**Phenyl(m-tolyl)methanone (3ae):** <sup>2</sup>

<sup>1</sup>H NMR (400 MHz, CDCl<sub>3</sub>)  $\delta$ : 7.81 (dd,  $J$  = 1.2 Hz,  $J$  = 8.4 Hz, 2H), 7.62-7.57 (m, 3H), 7.46-7.40 (m, 2H), 7.38 (dd,  $J$  = 4.4 Hz,  $J$  = 4.4 Hz, 2H), 2.41 (s, 3H); <sup>13</sup>C NMR (100 MHz, CDCl<sub>3</sub>)  $\delta$ : 196.8, 138.1, 137.4, 137.1, 133.0, 132.1, 130.6, 130.1, 128.4, 128.0, 127.2, 21.3; IR (neat cm<sup>-1</sup>): 1663 (C=O); LRMS (EI 70 ev)  $m/z$  (%): 196 (M<sup>+</sup>, 100); HRMS  $m/z$  (ESI) calcd for C<sub>14</sub>H<sub>13</sub>O (M+H)<sup>+</sup> 197.0960, found 197.0954.

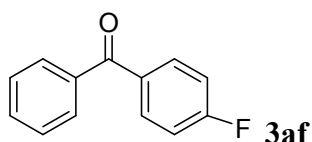

**(4-Fluorophenyl)(phenyl)methanone (3af):** <sup>1</sup>

<sup>1</sup>H NMR (400 MHz, CDCl<sub>3</sub>)  $\delta$ : 7.86-7.83 (m, 2H), 7.78 (d,  $J$  = 4.2 Hz, 2H), 7.62 (dd,  $J$  = 7.2 Hz,  $J$  = 1.2 Hz, 1H), 7.51 (t,  $J$  = 7.6 Hz, 2H), 7.18 (t,  $J$  = 8.6 Hz, 2H); <sup>13</sup>C NMR (100 MHz, CDCl<sub>3</sub>)  $\delta$ : 195.5, 165.5, 162.9, 137.6, 132.7, 132.7, 132.6, 132.4, 132.0, 129.8, 128.3, 115.5, 115.3; IR (neat cm<sup>-1</sup>): 1661 (C=O); LRMS (EI 70 ev)  $m/z$  (%): 200 (M<sup>+</sup>, 100); HRMS  $m/z$  (ESI) calcd for C<sub>13</sub>H<sub>10</sub>FO (M+H)<sup>+</sup> 201.0710, found 201.0719.

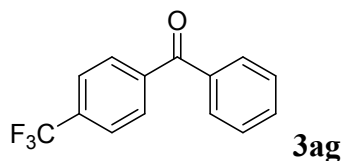

**4-Trifluoromethylbenzophenone (3ag):** <sup>1</sup>

<sup>1</sup>H NMR (400 MHz, CDCl<sub>3</sub>)  $\delta$ : 7.90 (d,  $J$  = 8.0 Hz, 2H), 7.81 (dd,  $J$  = 7.6 Hz,  $J$  = 8.0 Hz, 4H),

7.65 (t,  $J = 7.2$  Hz, 2H), 7.53 (t,  $J = 7.4$  Hz, 2H);  $^{13}\text{C}$  NMR (100 MHz,  $\text{CDCl}_3$ )  $\delta$ : 195.5, 140.6, 136.6, 133.8, 133.5, 133.0, 130.1, 130.0, 128.5, 125.38, 125.34, 125.31, 125.2, 125.0, 122.2; IR (neat  $\text{cm}^{-1}$ ): 1660 (C=O); LRMS (EI 70 ev)  $m/z$  (%): 250 ( $\text{M}^+$ , 100); HRMS  $m/z$  (ESI) calcd for  $\text{C}_{14}\text{H}_{10}\text{F}_3\text{O}$  ( $\text{M}+\text{H}$ ) $^+$  251.0672, found 251.0667.

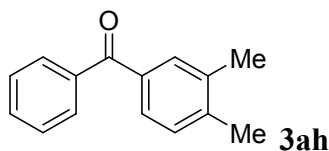

**(3,4-Dimethylphenyl)(phenyl)methanone (3ah):** <sup>3</sup>

$^1\text{H}$  NMR (400 MHz,  $\text{CDCl}_3$ )  $\delta$ : 7.79 (t,  $J = 4.2$  Hz, 2H), 7.61 (s, 1H), 7.59-7.52 (m, 2H), 7.49 (t,  $J = 7.6$  Hz, 2H), 7.23 (d,  $J = 7.6$  Hz, 1H), 2.35 (s, 3H), 2.32 (s, 3H);  $^{13}\text{C}$  NMR (100 MHz,  $\text{CDCl}_3$ )  $\delta$ : 198.3, 141.9, 138.0, 136.7, 135.3, 132.0, 131.1, 129.9, 129.4, 128.1, 128.0, 20.0, 19.7; IR (neat  $\text{cm}^{-1}$ ): 1661 (C=O); LRMS (EI 70 ev)  $m/z$  (%): 210 ( $\text{M}^+$ , 100); HRMS  $m/z$  (ESI) calcd for  $\text{C}_{15}\text{H}_{15}\text{O}$  ( $\text{M}+\text{H}$ ) $^+$  211.1116, found 211.1111.

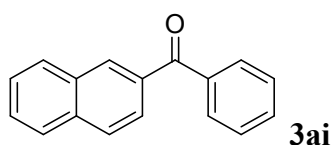

**(Naphthalen-6-yl)(phenyl)methanone (3ai):** <sup>4</sup>

$^1\text{H}$  NMR (400 MHz,  $\text{CDCl}_3$ )  $\delta$ : 8.23 (s, 1H), 7.98-7.84 (m, 6H), 7.63-7.56 (m, 2H), 7.52-7.44 (m, 3H);  $^{13}\text{C}$  NMR (100 MHz,  $\text{CDCl}_3$ )  $\delta$ : 196.1, 137.8, 135.1, 134.6, 132.4, 32.1, 131.7, 130.0, 129.4, 128.5, 128.3, 128.1, 127.7, 126.7, 125.6; IR (neat  $\text{cm}^{-1}$ ): 1660 (C=O); LRMS (EI 70 ev)  $m/z$  (%): 232 ( $\text{M}^+$ , 100); HRMS  $m/z$  (ESI) calcd for  $\text{C}_{17}\text{H}_{13}\text{O}$  ( $\text{M}+\text{H}$ ) $^+$  233.0959, found 233.0961.

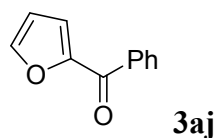

**(Furan-2-yl)(phenyl)methanone (3aj):** <sup>5</sup>

$^1\text{H}$  NMR (400 MHz,  $\text{CDCl}_3$ )  $\delta$ : 7.99-7.94 (m, 2H), 7.72 (dd,  $J = 2.4$  Hz,  $J = 1.2$  Hz, 1H), 7.64-7.57 (m, 1H), 7.51-7.44 (m, 2H), 7.24 (dd,  $J = 4.8$  Hz,  $J = 1.2$  Hz, 1H), 6.61 (dd,  $J = 4.8$  Hz,  $J = 2.4$  Hz, 1H);  $^{13}\text{C}$  NMR (100 MHz,  $\text{CDCl}_3$ )  $\delta$ : 182.8, 152.2, 147.2, 137.1, 132.2, 129.2, 128.4, 120.7, 112.5; IR (neat  $\text{cm}^{-1}$ ): 1630 (C=O); LRMS (EI 70 ev)  $m/z$  (%): 172 ( $\text{M}^+$ , 100); HRMS  $m/z$  (ESI) calcd for  $\text{C}_{11}\text{H}_9\text{O}_2$  ( $\text{M}+\text{H}$ ) $^+$  173.0637, found 173.0648.

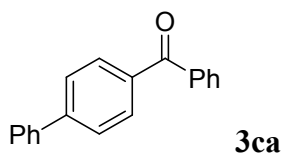

**Biphenyl-4-yl(phenyl)methanone (3ca):** <sup>6</sup>

<sup>1</sup>H NMR (400 MHz, CDCl<sub>3</sub>)  $\delta$ : 7.90-7.87 (m, 2H), 7.84-7.80 (m, 2H), 7.71-7.59 (m, 5H), 7.50-7.39 (m, 5H); <sup>13</sup>C NMR (100 MHz, CDCl<sub>3</sub>)  $\delta$ : 196.4, 144.9, 140.0, 137.5, 136.2, 132.1, 130.7, 139.9, 129.0, 128.4, 128.1, 127.2, 127.7; IR (neat cm<sup>-1</sup>): 1651 (C=O); LRMS (EI 70 ev)  $m/z$  (%): 258 (M<sup>+</sup>, 100); HRMS  $m/z$  (ESI) calcd for C<sub>19</sub>H<sub>15</sub>O (M+H)<sup>+</sup> 259.1124, found 259.1127.

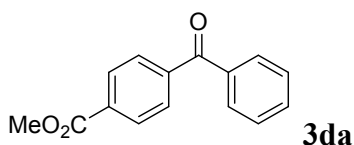

**Methyl 4-Benzoylbenzoate (3da):** <sup>7</sup>

<sup>1</sup>H NMR (400 MHz, CDCl<sub>3</sub>)  $\delta$ : 8.14 (d,  $J$  = 8.4 Hz, 2H), 7.81 (d,  $J$  = 8.4 Hz, 2H), 7.78-7.76 (m, 2H), 7.60-7.56 (m, 1H), 7.48 (t,  $J$  = 7.6 Hz, 2H), 3.96 (s, 3H); <sup>13</sup>C NMR (100 MHz, CDCl<sub>3</sub>)  $\delta$ : 196.1, 166.2, 141.0, 137.0, 133.1, 132.8, 130.0, 129.6, 129.3, 128.2, 52.1; IR (neat cm<sup>-1</sup>): 1731 (C=O), 1652 (C=O); LRMS (EI 70 ev)  $m/z$  (%): 240 (M<sup>+</sup>, 100); HRMS  $m/z$  (ESI) calcd for C<sub>15</sub>H<sub>13</sub>O<sub>3</sub> (M+H)<sup>+</sup> 241.0861, found 241.0855.

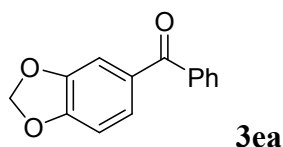

**(3,4-Methylenedioxyphenyl)phenylmethanone (3ea):** <sup>8</sup>

<sup>1</sup>H NMR (400 MHz, CDCl<sub>3</sub>)  $\delta$ : 7.76-7.70 (m, 2H), 7.57-7.51 (m, 1H), 7.47-7.42 (m, 2H), 7.37-7.32 (m, 2H), 6.85 (d,  $J$  = 8.4 Hz, 1H), 6.04 (s, 2H); <sup>13</sup>C NMR (100 MHz, CDCl<sub>3</sub>)  $\delta$ : 195.2, 151.7, 148.3, 138.4, 132.3, 132.1, 129.9, 128.1, 127.3, 110.2, 108.0, 102.1; IR (neat cm<sup>-1</sup>): 1663 (C=O); LRMS (EI 70 ev)  $m/z$  (%): 226 (M<sup>+</sup>, 100); HRMS  $m/z$  (ESI) calcd for C<sub>14</sub>H<sub>11</sub>O<sub>3</sub> (M+H)<sup>+</sup> 227.0703, found 227.0698.

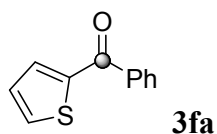

**Phenyl(thiophen-2-yl)methanone (3fa):** <sup>9</sup>

<sup>1</sup>H NMR (400 MHz, CDCl<sub>3</sub>)  $\delta$ : 7.87 (d,  $J$  = 7.6 Hz, 2H), 7.73 (d,  $J$  = 4.8 Hz, 1H), 7.65 (d,  $J$  = 3.6

Hz, 1H), 7.61 (t,  $J = 7.4$  Hz, 1H), 7.51 (t,  $J = 7.8$  Hz, 2H), 7.17 (t,  $J = 4.4$  Hz, 1H);  $^{13}\text{C}$  NMR (100 MHz,  $\text{CDCl}_3$ )  $\delta$ : 188.2, 143.6, 138.1, 134.8, 134.1, 132.2, 129.1, 128.3, 127.9; IR (neat  $\text{cm}^{-1}$ ): 1638 (C=O); LRMS (EI 70 ev)  $m/z$  (%): 188 ( $\text{M}^+$ , 100); HRMS  $m/z$  (ESI) calcd for  $\text{C}_{11}\text{H}_9\text{OS}$  ( $\text{M} + \text{H}$ ) $^+$  189.0368, found 189.0361.

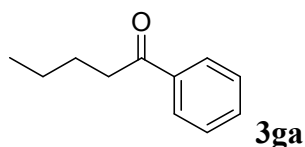

#### 1-phenylpentan-1-one (3ga):<sup>4</sup>

$^1\text{H}$  NMR (400 MHz,  $\text{CDCl}_3$ )  $\delta$ : 7.97-7.93 (m, 2H), 7.56-7.52 (m, 1H), 7.47-7.43 (m, 2H); 2.93 (t,  $J = 7.2$  Hz, 2H), 1.76-1.68 (m, 2H), 1.46-1.36 (m, 2H), 0.90 (t,  $J = 7.24$  Hz, 3H);  $^{13}\text{C}$  NMR (100 MHz,  $\text{CDCl}_3$ )  $\delta$ : 200.2, 137.4, 132.5, 128.4, 128.0, 38.4, 26.7, 22.4, 13.9; IR (neat  $\text{cm}^{-1}$ ): 1671 (C=O); LRMS (EI 70 ev)  $m/z$  (%): 162 ( $\text{M}^+$ , 100); HRMS  $m/z$  (ESI) calcd for  $\text{C}_{11}\text{H}_{15}\text{O}$  ( $\text{M} + \text{H}$ ) $^+$  163.1117, found 163.1113.

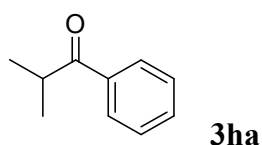

#### 2-Methyl-1-phenylpropan-1-one (3ha):<sup>1</sup>

$^1\text{H}$  NMR (400 MHz,  $\text{CDCl}_3$ )  $\delta$ : 7.96-7.92 (m, 2H), 7.58-7.52 (m, 1H), 7.48-7.42 (m, 2H); 3.69-3.54 (m, 1H), 1.26 (d,  $J = 6.8$  Hz, 6H);  $^{13}\text{C}$  NMR (100 MHz,  $\text{CDCl}_3$ )  $\delta$ : 204.1, 136.0, 132.4, 128.6, 128.1, 35.0, 18.9; IR (neat  $\text{cm}^{-1}$ ): 1677 (C=O); LRMS (EI 70 ev)  $m/z$  (%): 148 ( $\text{M}^+$ , 100); HRMS  $m/z$  (ESI) calcd for  $\text{C}_{10}\text{H}_{13}\text{O}$  ( $\text{M} + \text{H}$ ) $^+$  149.0961, found 149.0967.

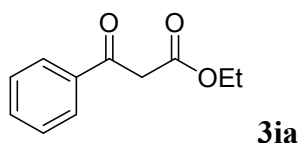

#### Ethyl 3-oxo-3-phenylpropanoate (3ia):<sup>10</sup>

$^1\text{H}$  NMR (400 MHz,  $\text{CDCl}_3$ )  $\delta$ : 7.89 (d,  $J = 7.6$  Hz, 2H), 7.54 (t,  $J = 7.4$  Hz, 1H), 7.42-7.32 (m, 2H), 4.22-4.11 (m, 2H), 3.93 (s, 2H), 1.20 (t,  $J = 7.0$  Hz, 3H);  $^{13}\text{C}$  NMR (100 MHz,  $\text{CDCl}_3$ )  $\delta$ : 192.3, 167.3, 135.6, 133.4, 128.5, 128.2, 61.1, 45.6, 13.8; IR (neat  $\text{cm}^{-1}$ ): 1711 (C=O), 1669 (C=O); LRMS (EI 70 ev)  $m/z$  (%): 192 ( $\text{M}^+$ , 100); HRMS  $m/z$  (ESI) calcd for  $\text{C}_{11}\text{H}_{13}\text{O}$  ( $\text{M} + \text{H}$ ) $^+$  193.0859, found 193.0863.

## (F) References



- 1) M. Li, C. Wang, H. Ge, *Org. Lett.* **2011**, *13*, 2062.
- 2) M. Cai, G. Zheng, L. Zhang, J. Peng, *Eur. J. Org. Chem.* **2009**, *2009*, 1585.
- 3) K. P. Boroujeni, *Chin. Chem. Lett.* **2010**, *21*, 1395.
- 4) G. Wang, X. Li, J. Dai, H. Xu, *J. Org. Chem.* **2014**, *79*, 7220.
- 5) T. T. Nguyen, N. Marquise, F. Chevallier, F. Mongin, *Chem. Eur. J.* **2011**, *17*, 10405.
- 6) L. Meng, J. Su, Z. Zha, L. Zhang, Z. Zhang, Z. Wang, *Chem. Eur. J.* **2013**, *19*, 5542.
- 7) Q. Zhou, S. Wei, W. Han, *J. Org. Chem.* **2014**, *79*, 1454.
- 8) T. T. Dang, A. Chen, A. M. Seayad, *RSC Adv.*, **2014**, *4*, 30019.
- 9) B. Xin, Y. Zhang and K. Cheng, *J. Org. Chem.* **2006**, *71*, 5725
- 10) M. Mineno, Y. Sawai, K. Kanno, N. Sawada, H. Mizufune, *J. Org. Chem.* **2014**, *78*, 5843.

(G) Spectra

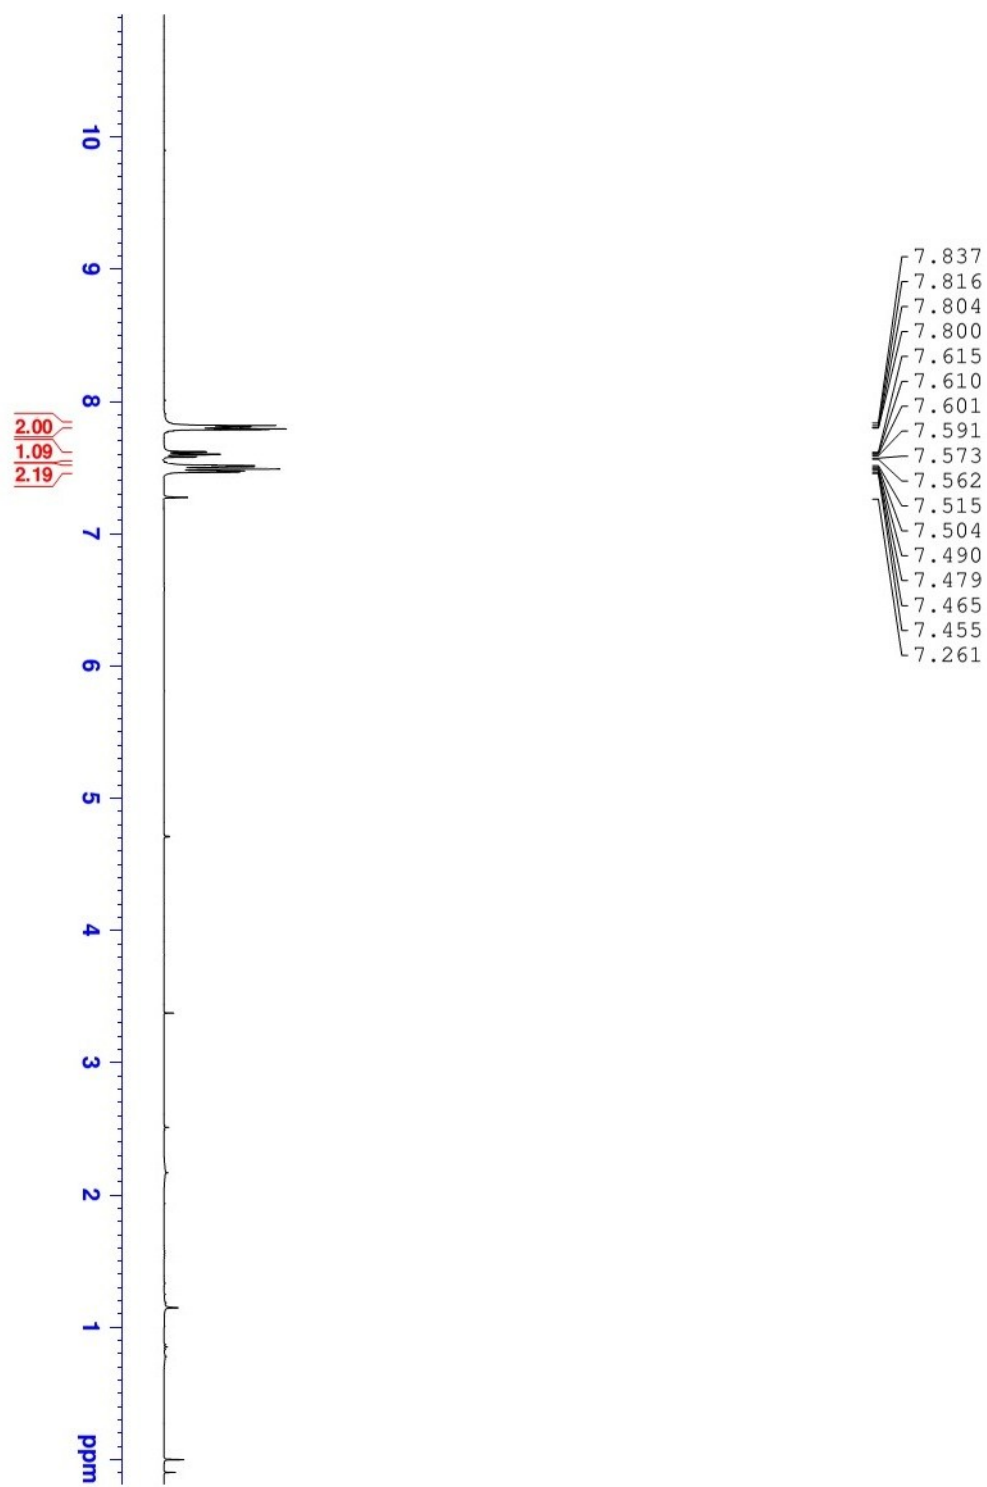

<sup>1</sup>H NMR of Compound 3aa

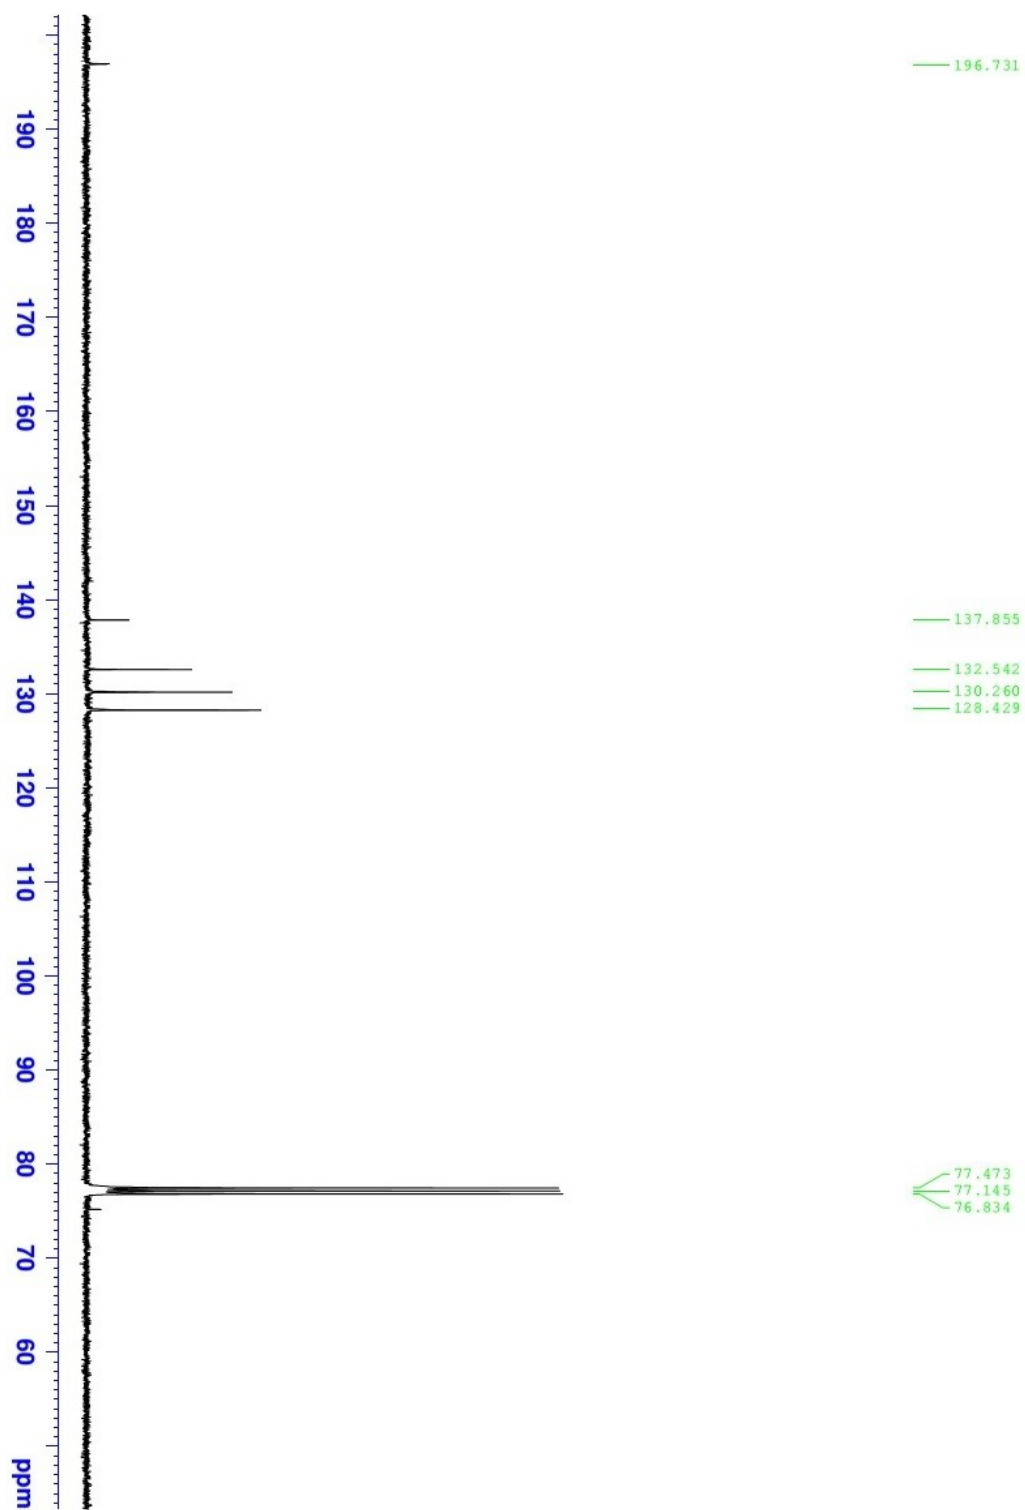

$^{13}\text{C}$  NMR of Compound 3aa

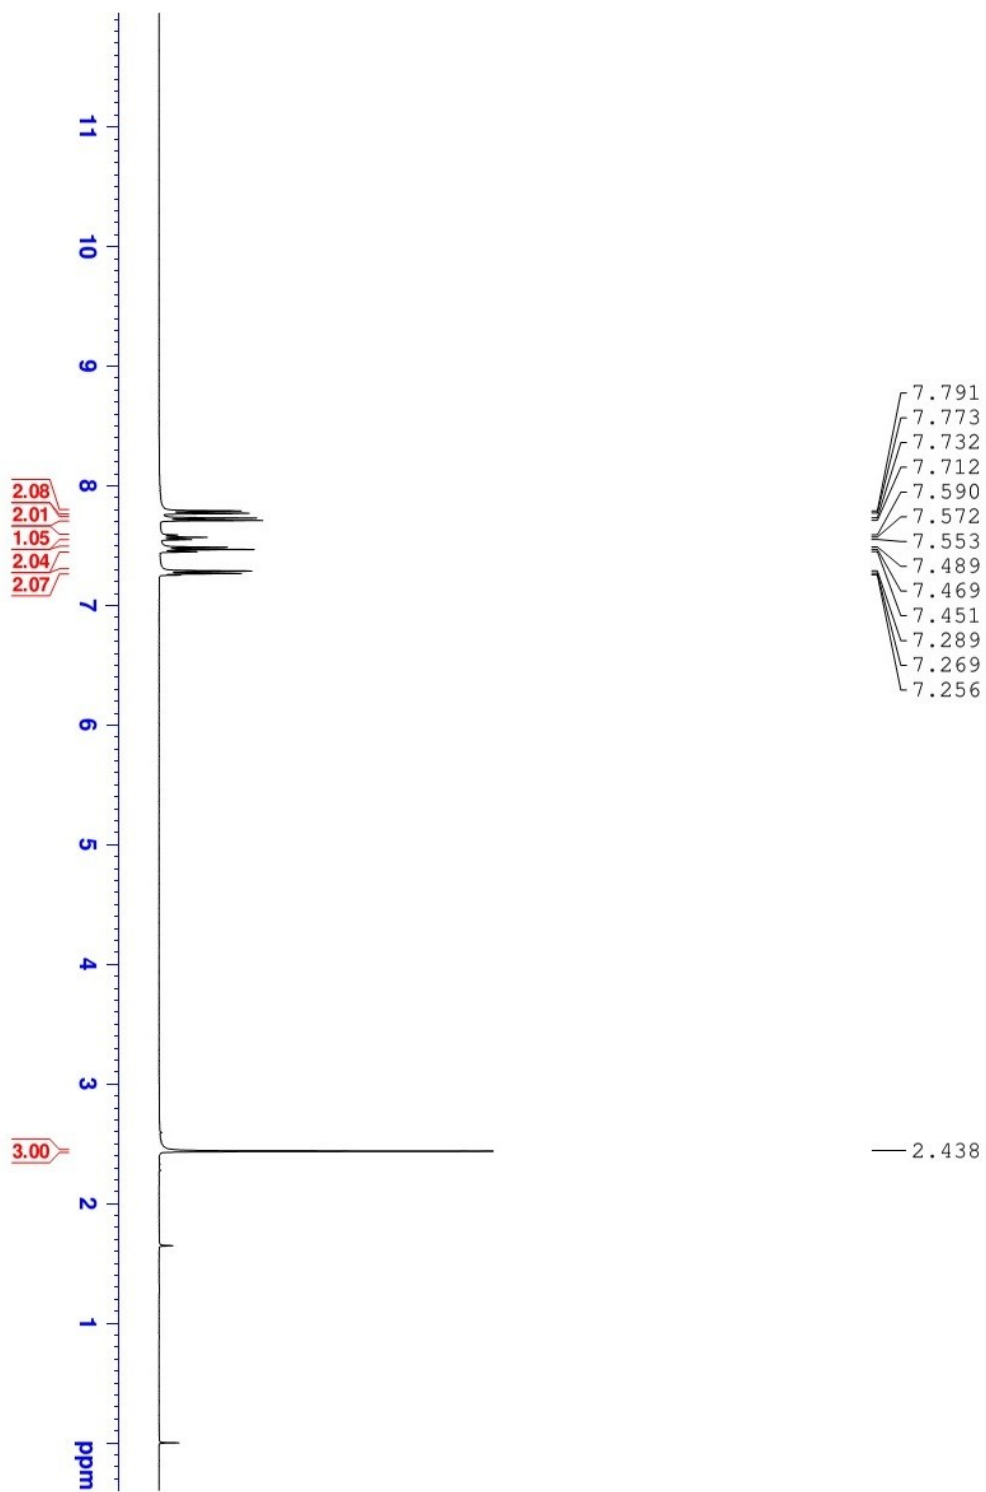

**<sup>1</sup>H NMR of Compound 3ab**

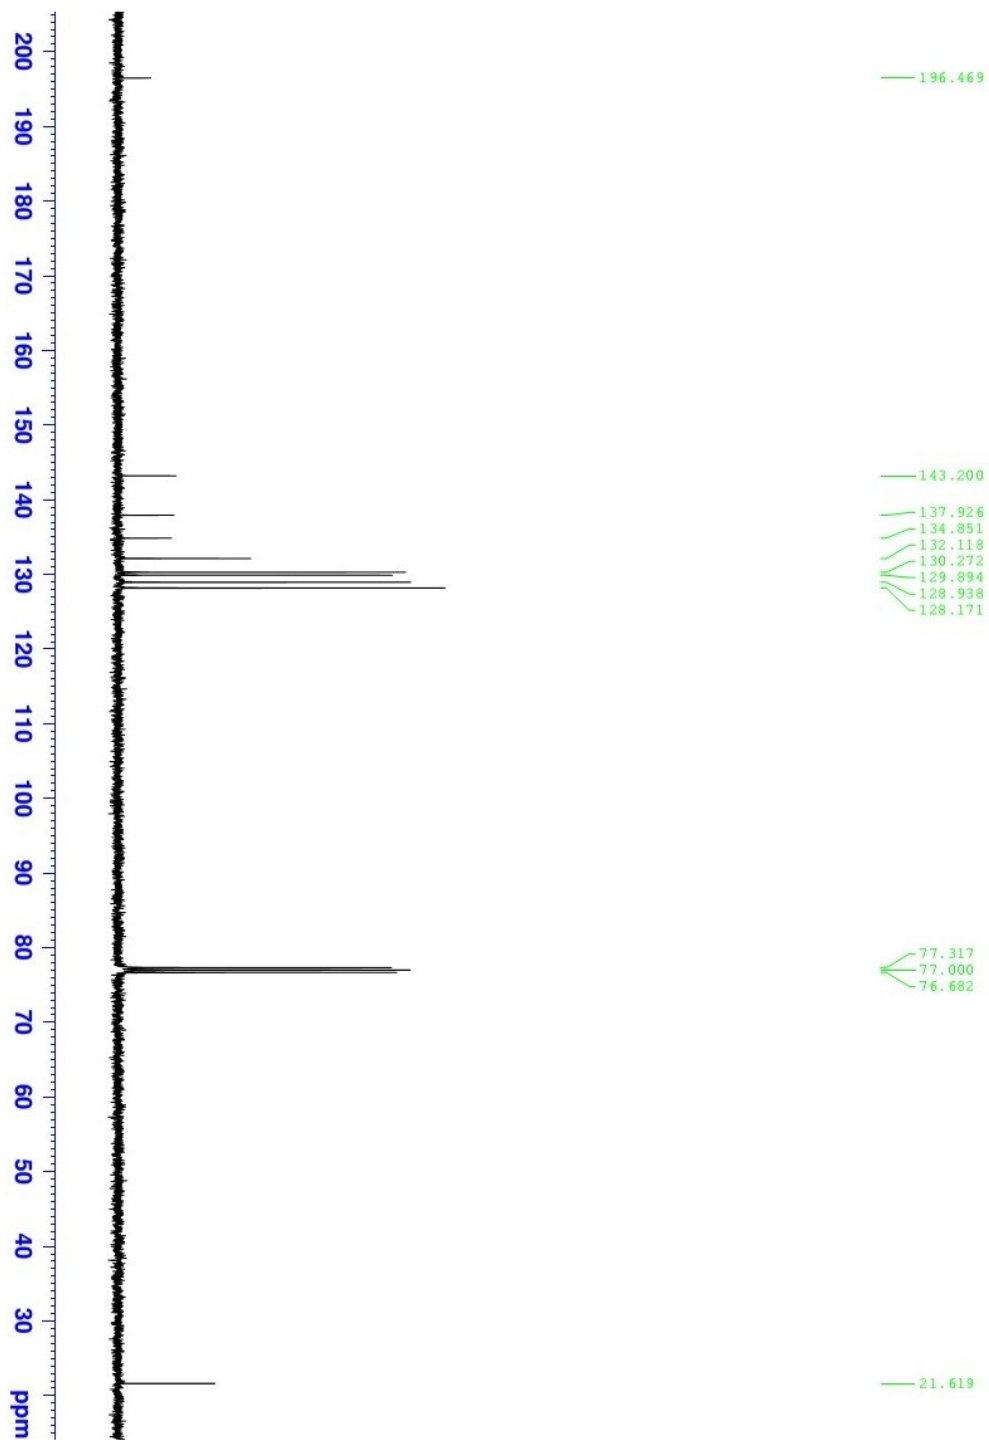

$^{13}\text{C}$  NMR of Compound 3ab

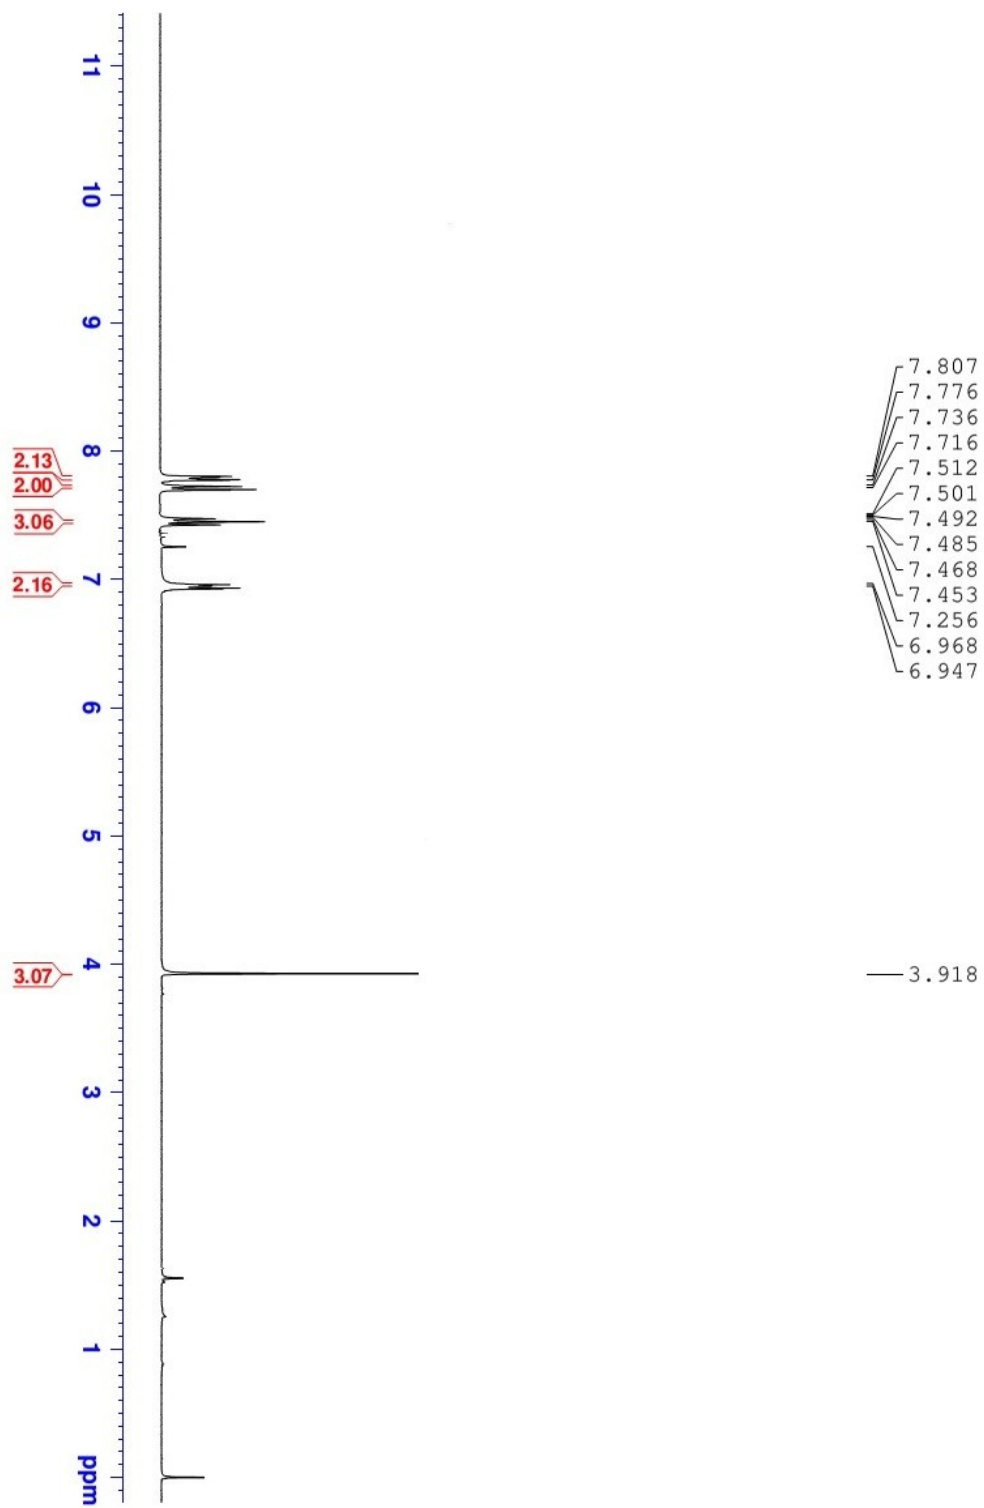

<sup>1</sup>H NMR of Compound 3ac

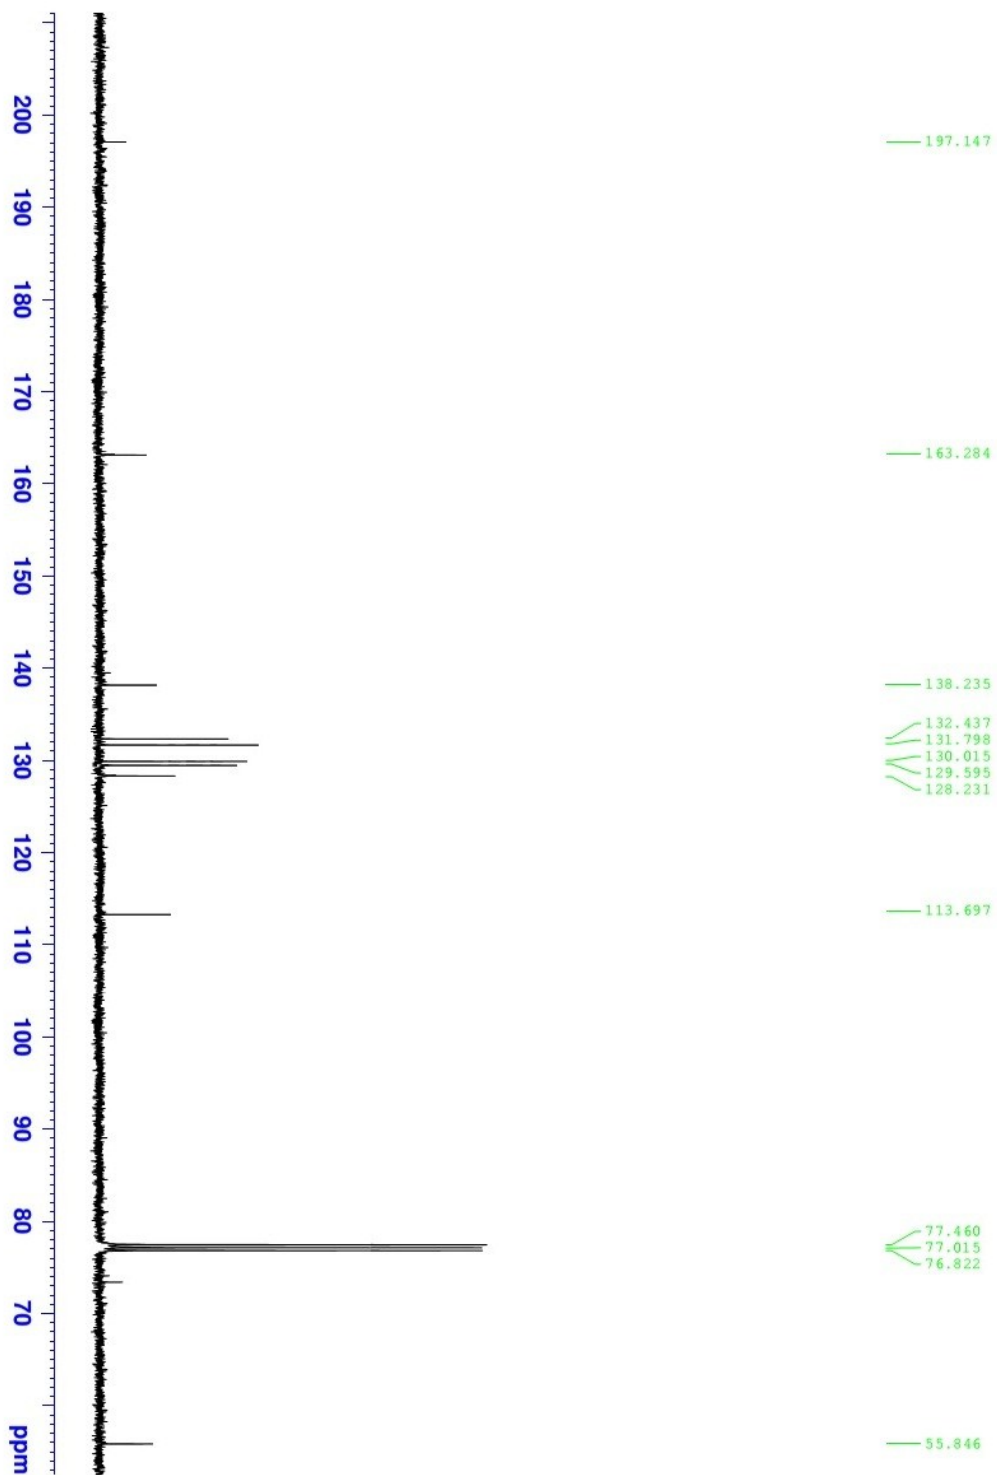

$^{13}\text{C}$  NMR of Compound 3ac

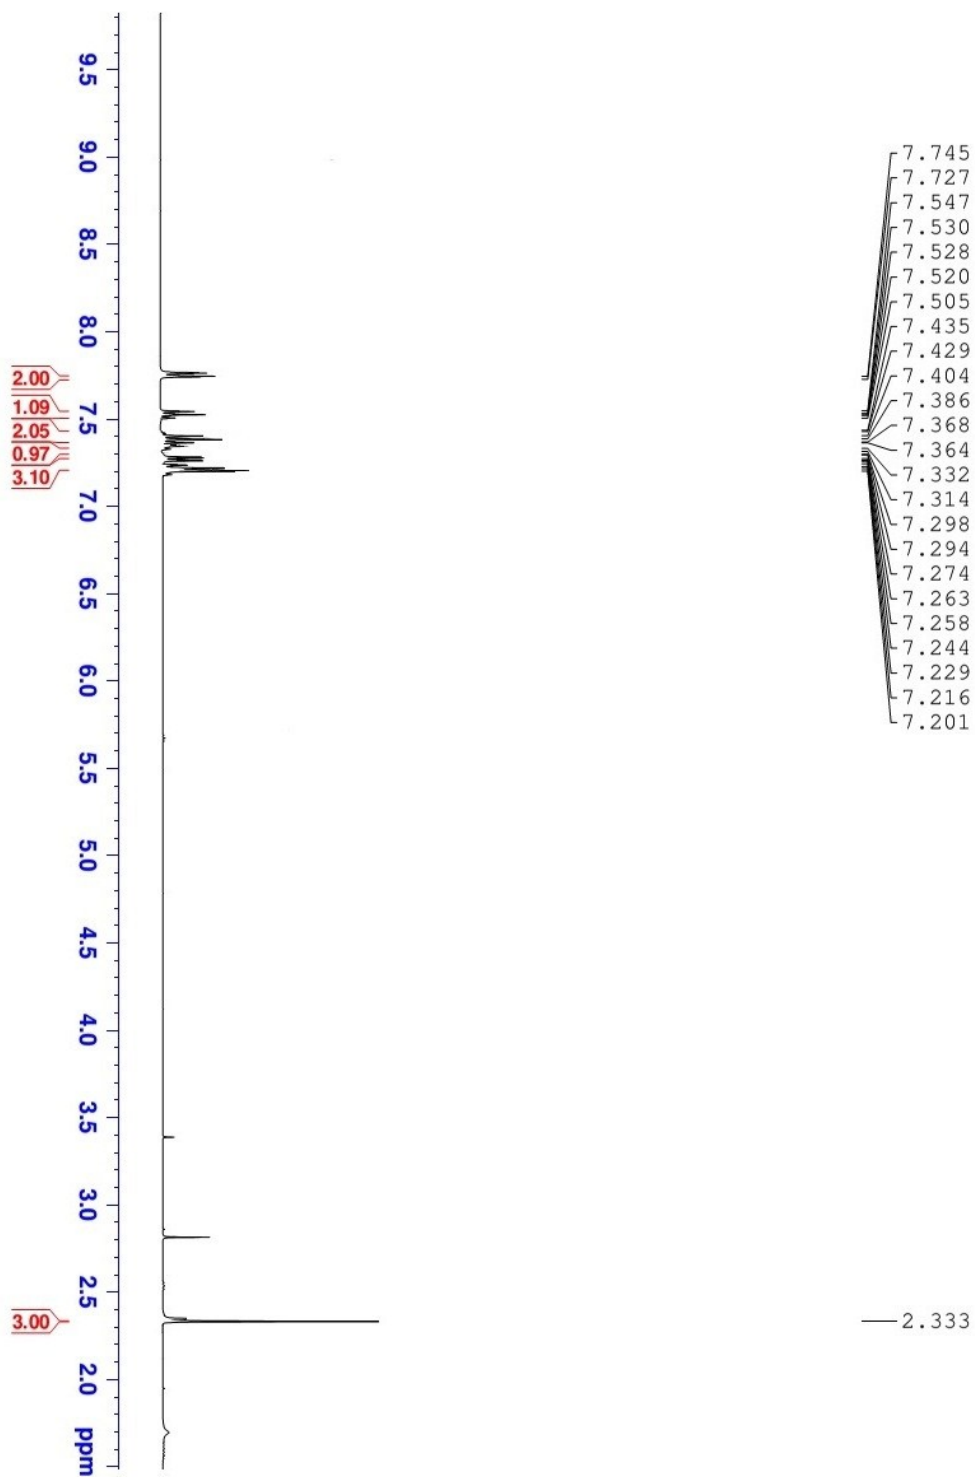

<sup>1</sup>H NMR of Compound 3ad



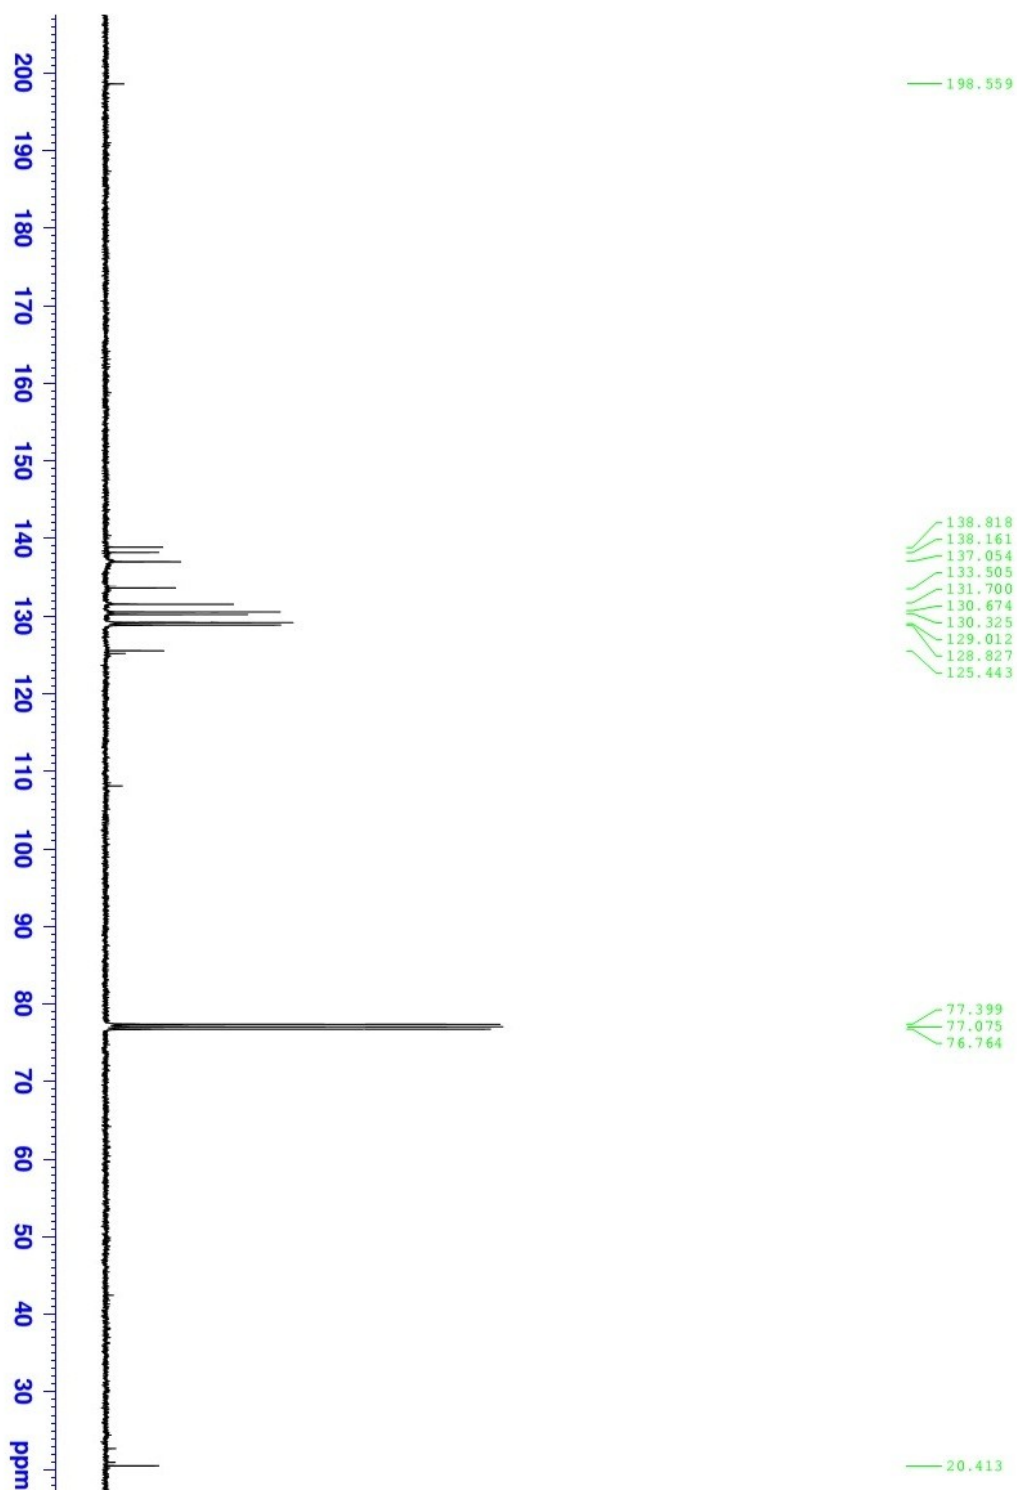

$^{13}\text{C}$  NMR of Compound 3ad

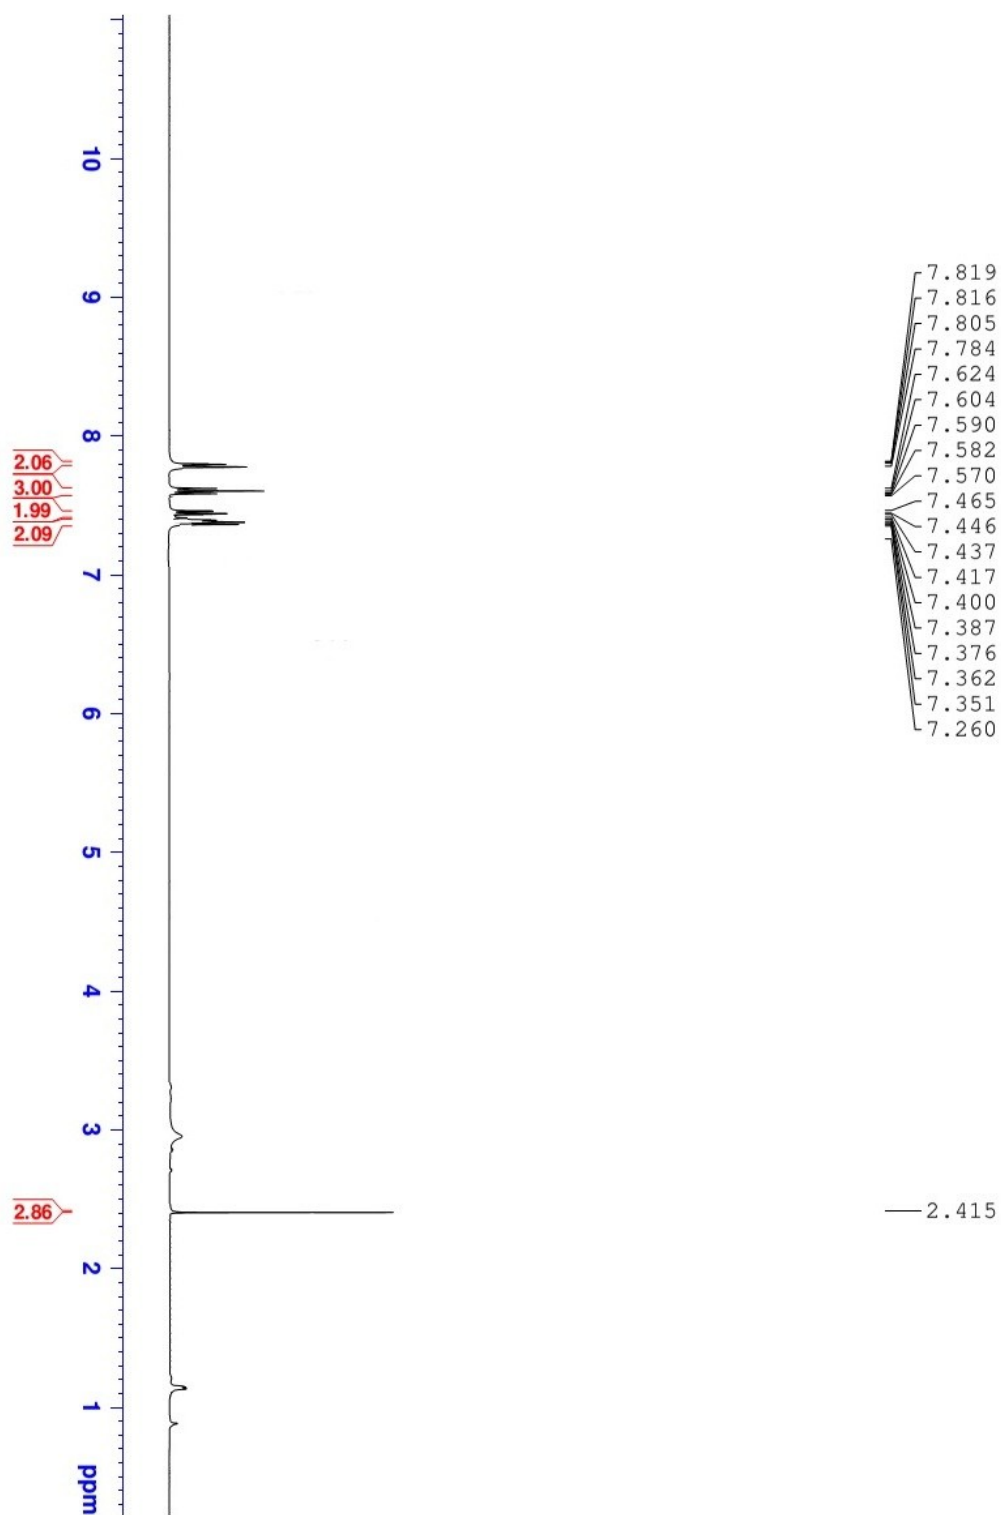

**$^1\text{H}$  NMR of Compound 3ae**

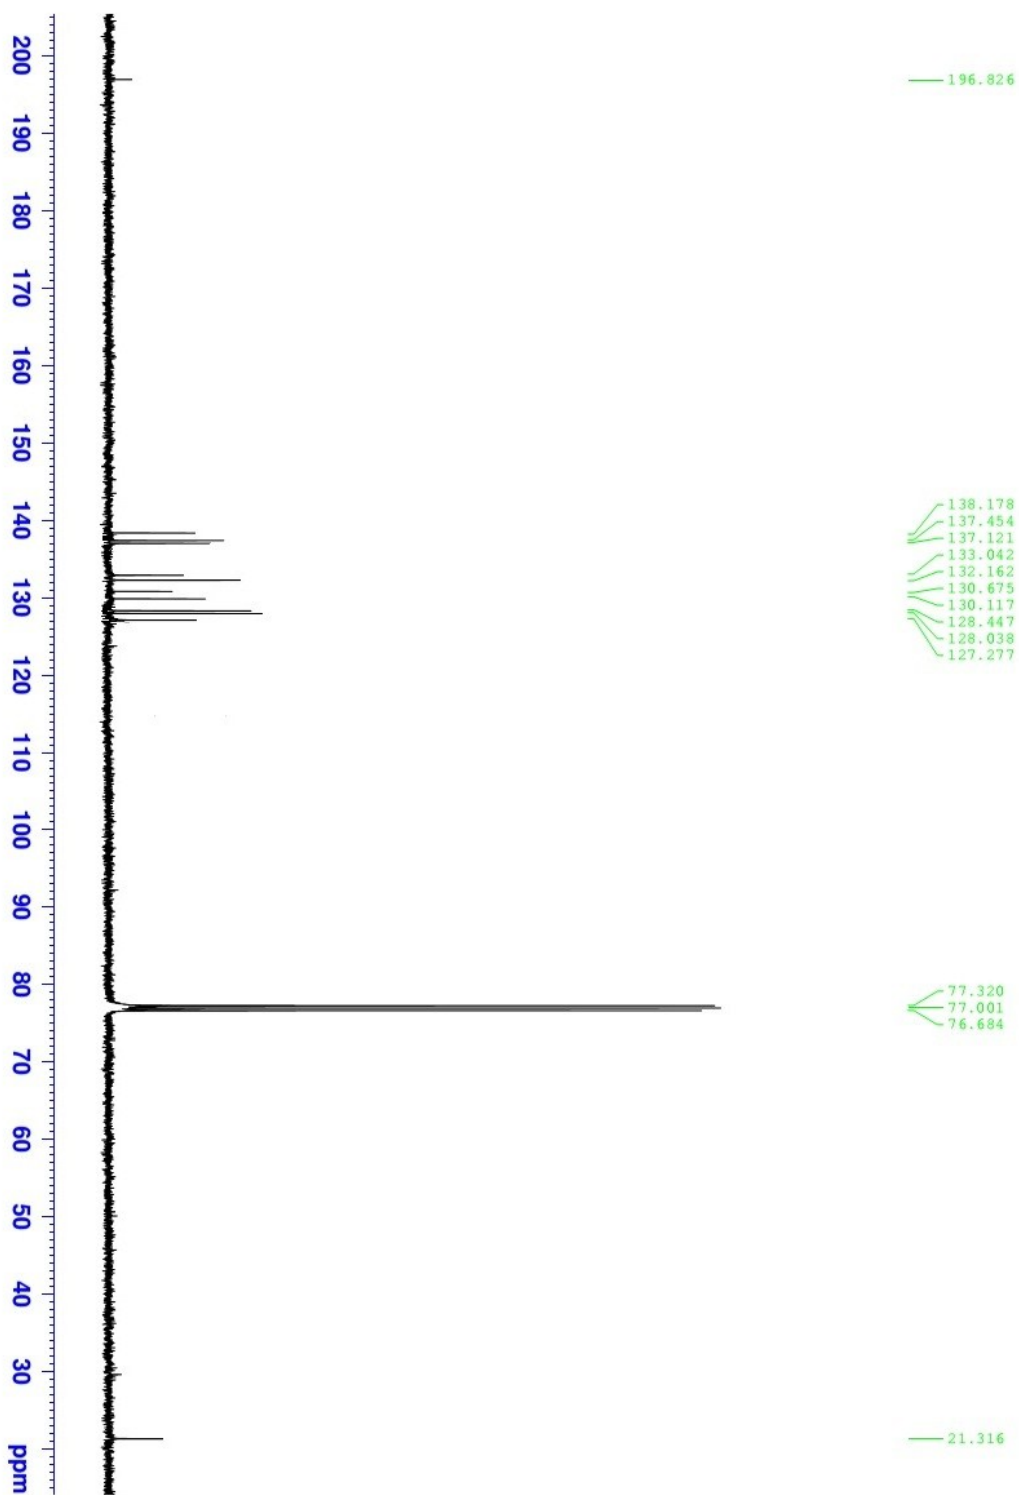

$^{13}\text{C}$  NMR of Compound 3ae

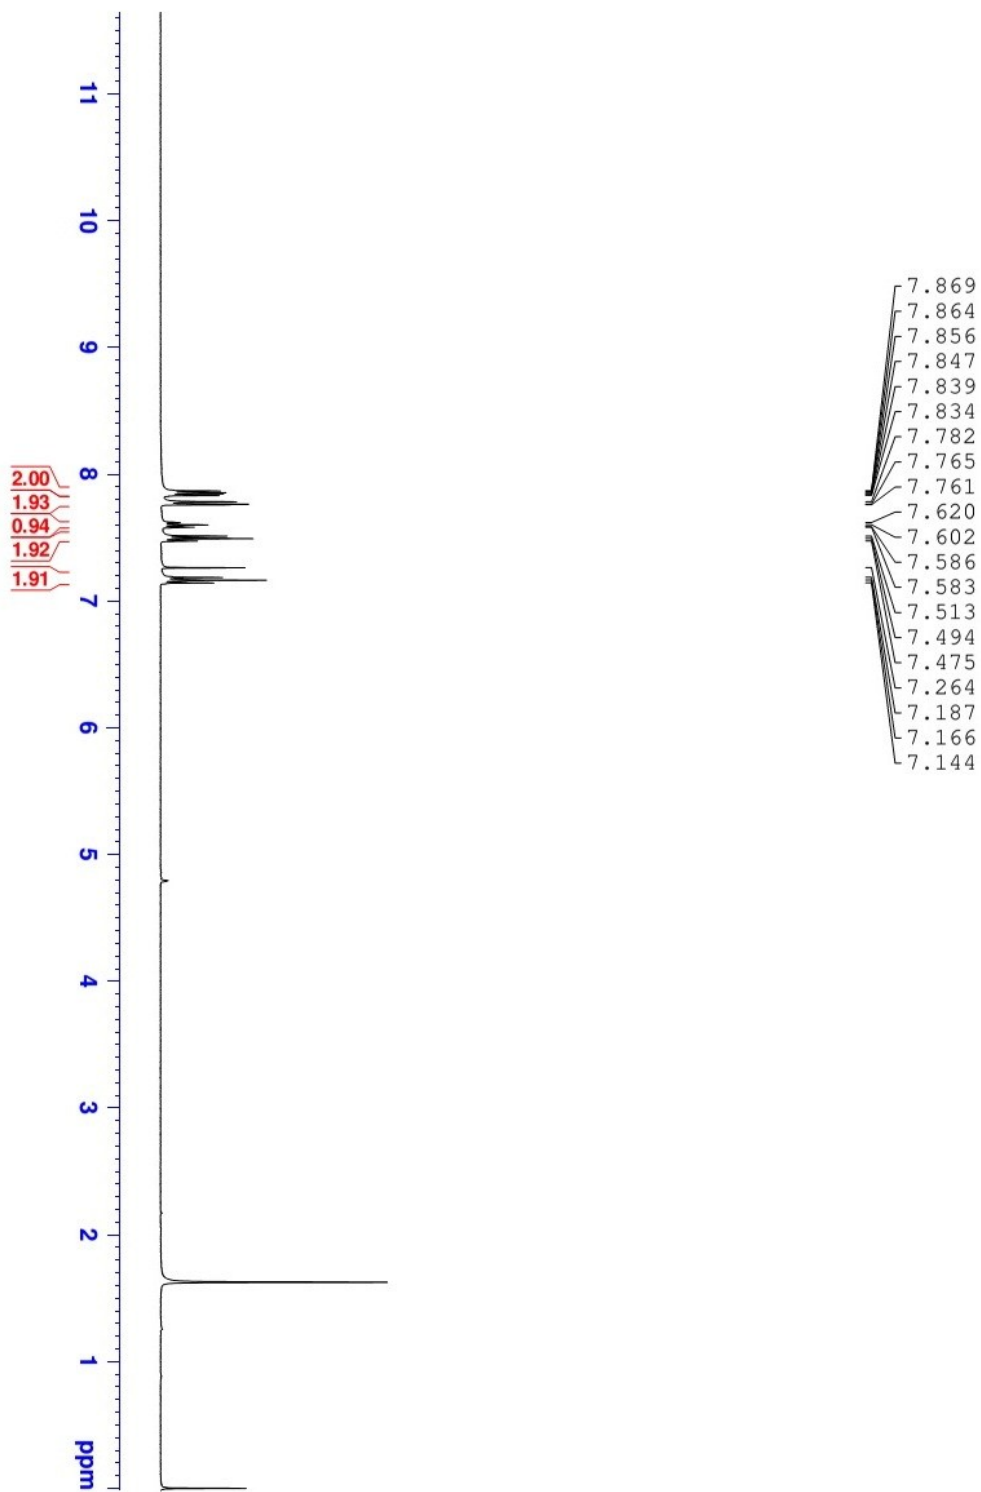

**$^1\text{H}$  NMR of Compound 3af**

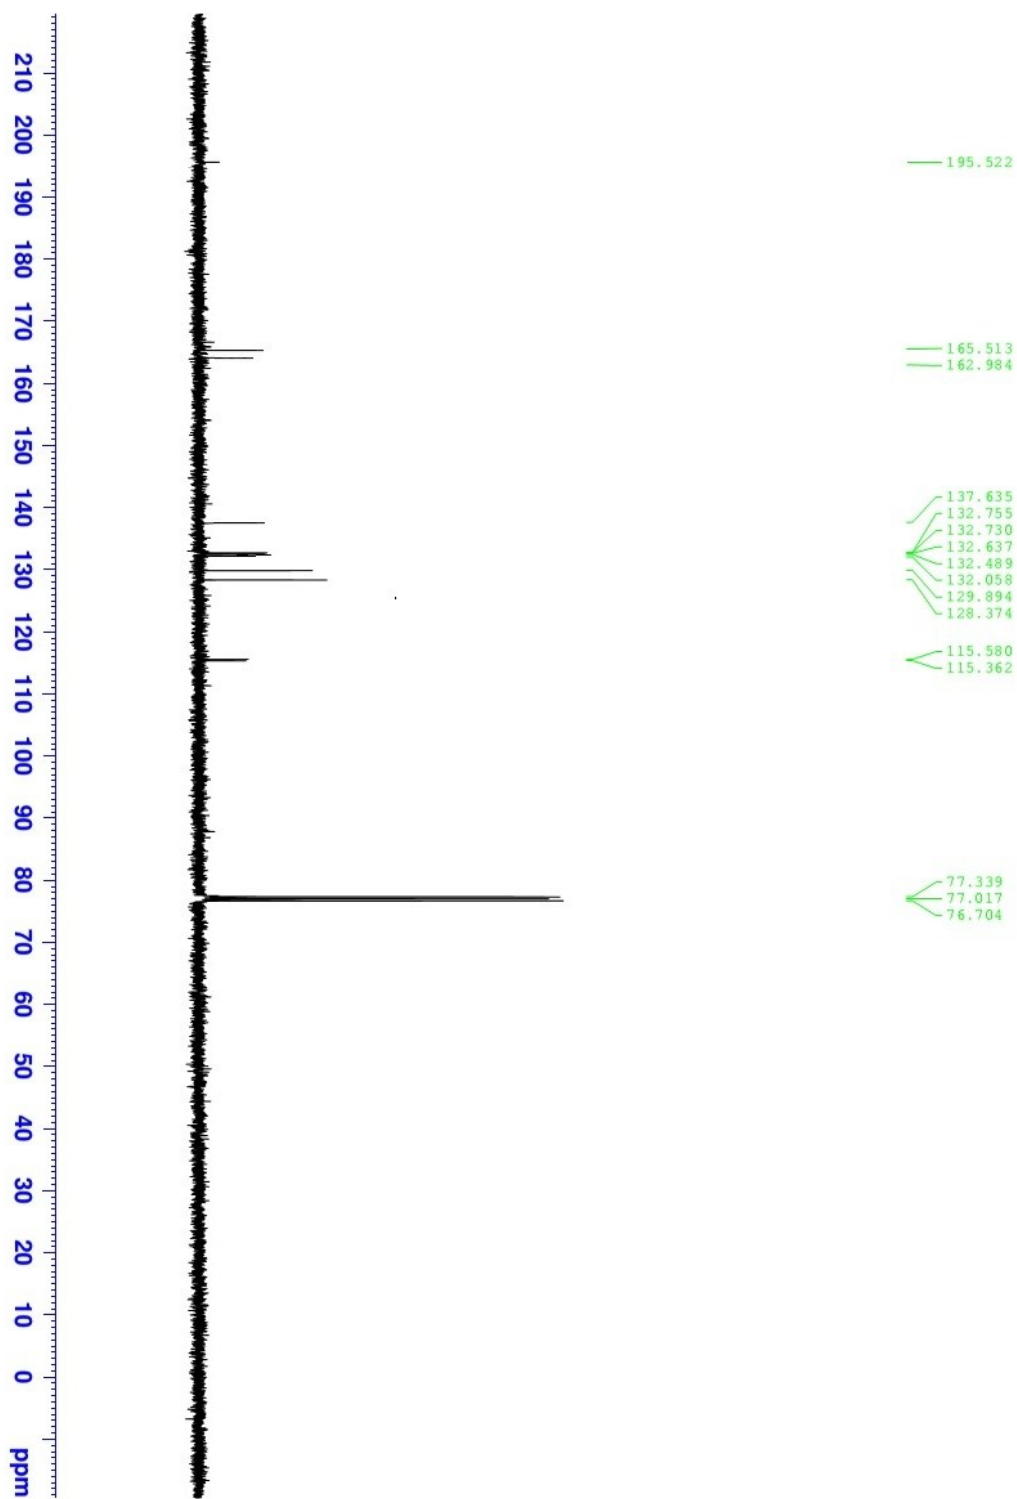

$^{13}\text{C}$  NMR of Compound 3af

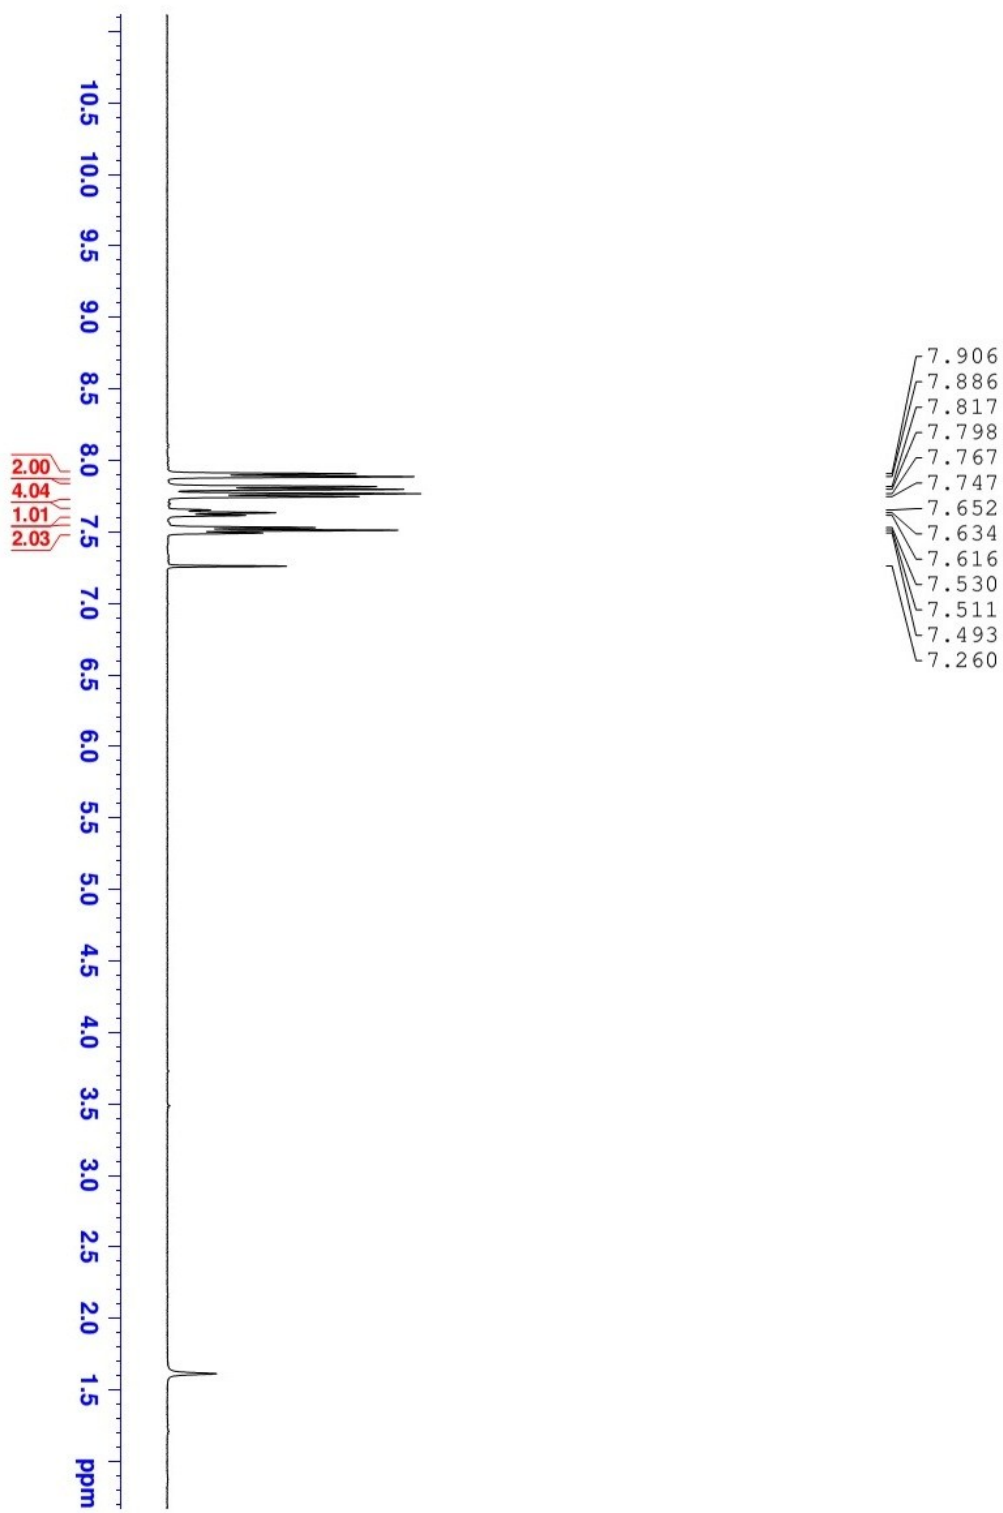

$^1\text{H}$  NMR of Compound 3ag

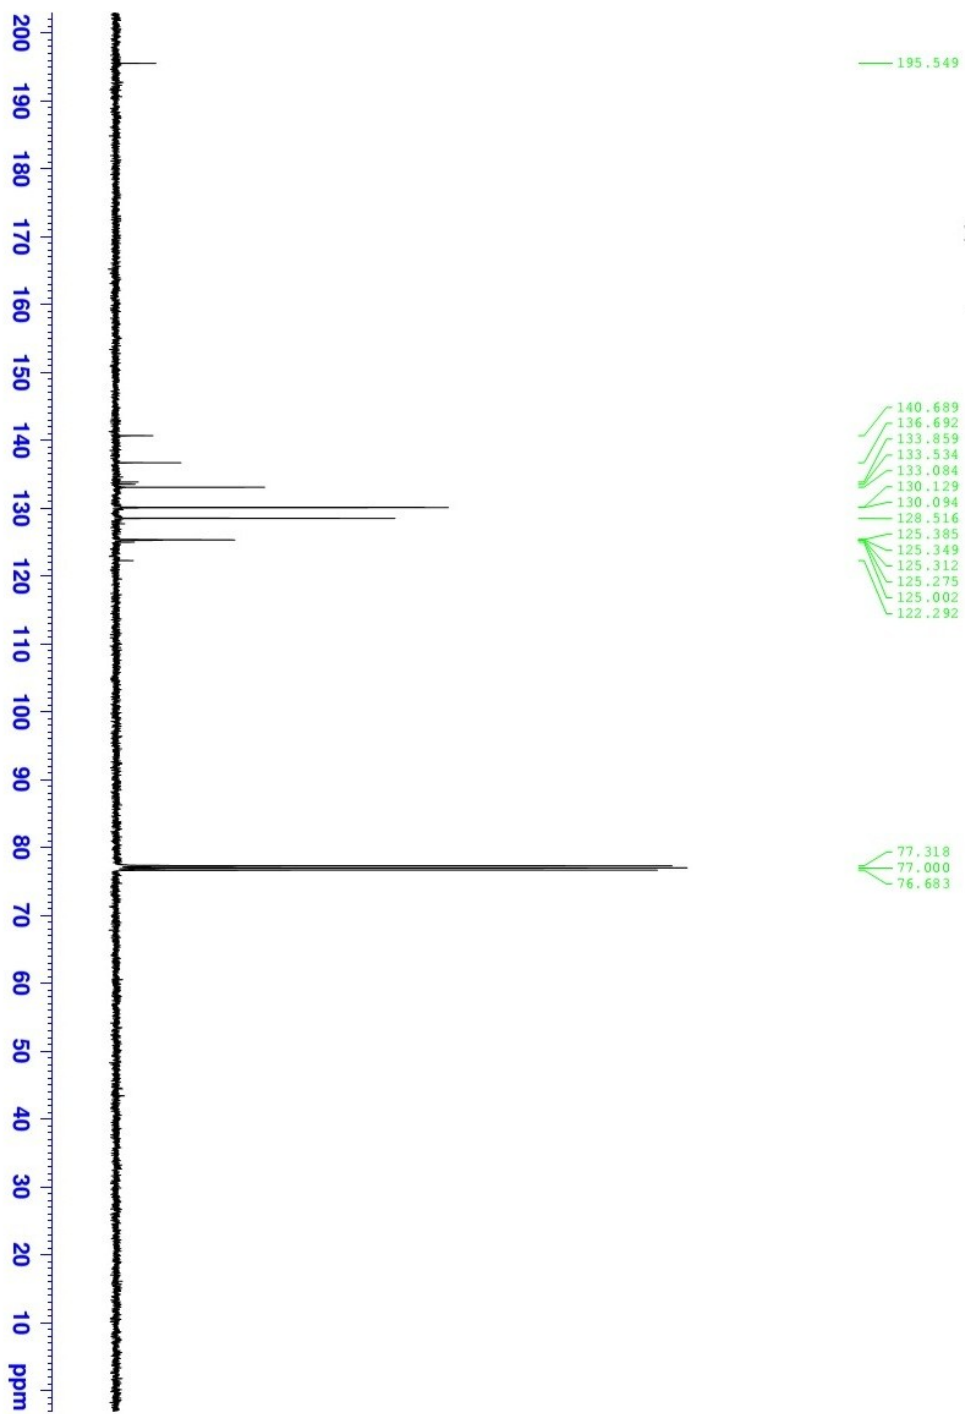

<sup>13</sup>C NMR of Compound 3ag

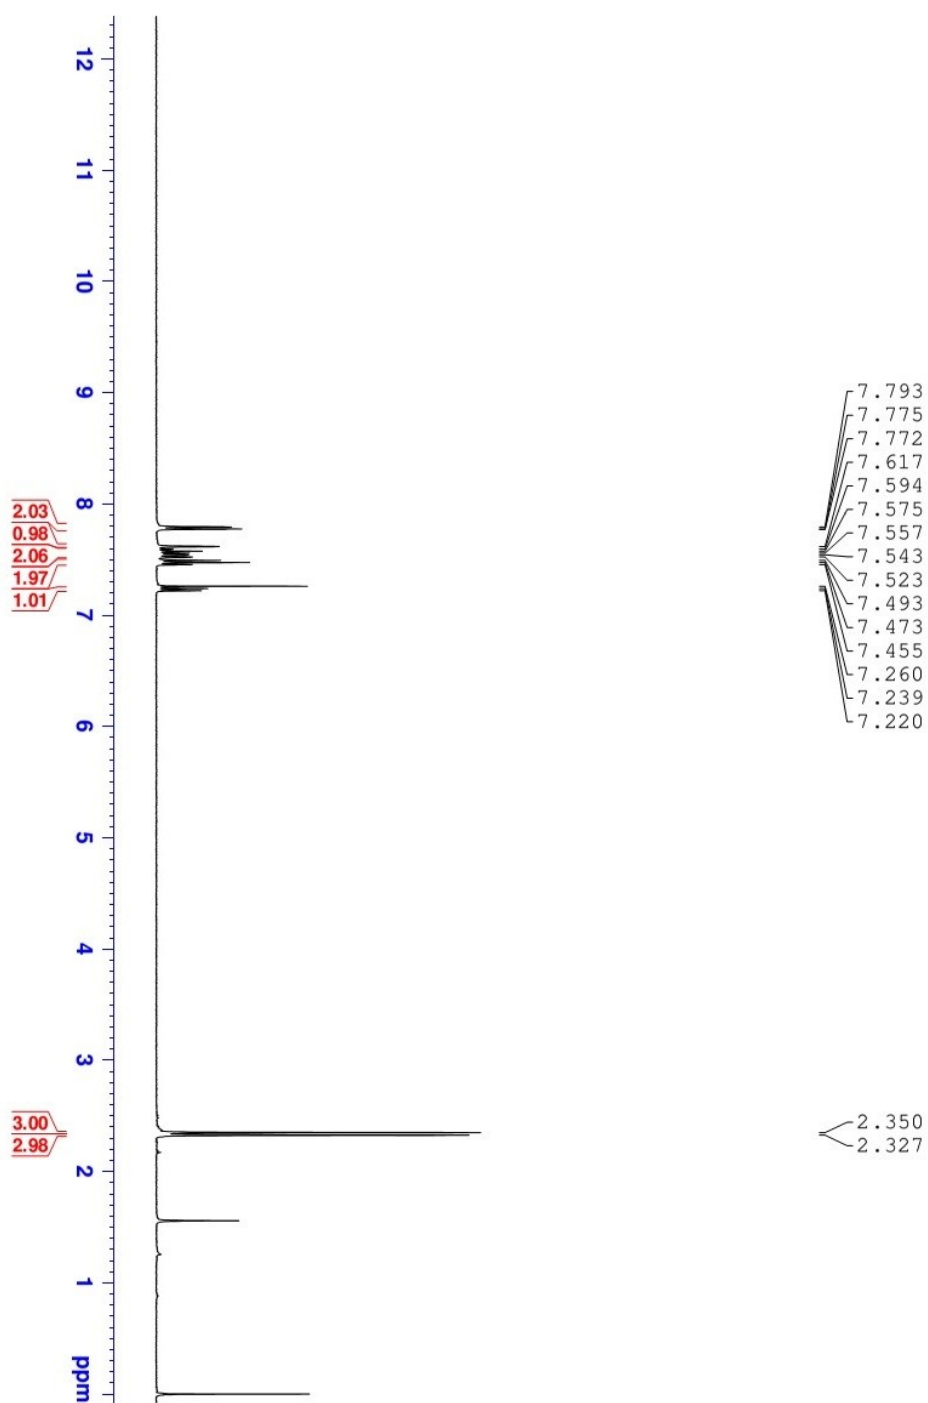

<sup>1</sup>H NMR of Compound 3ah



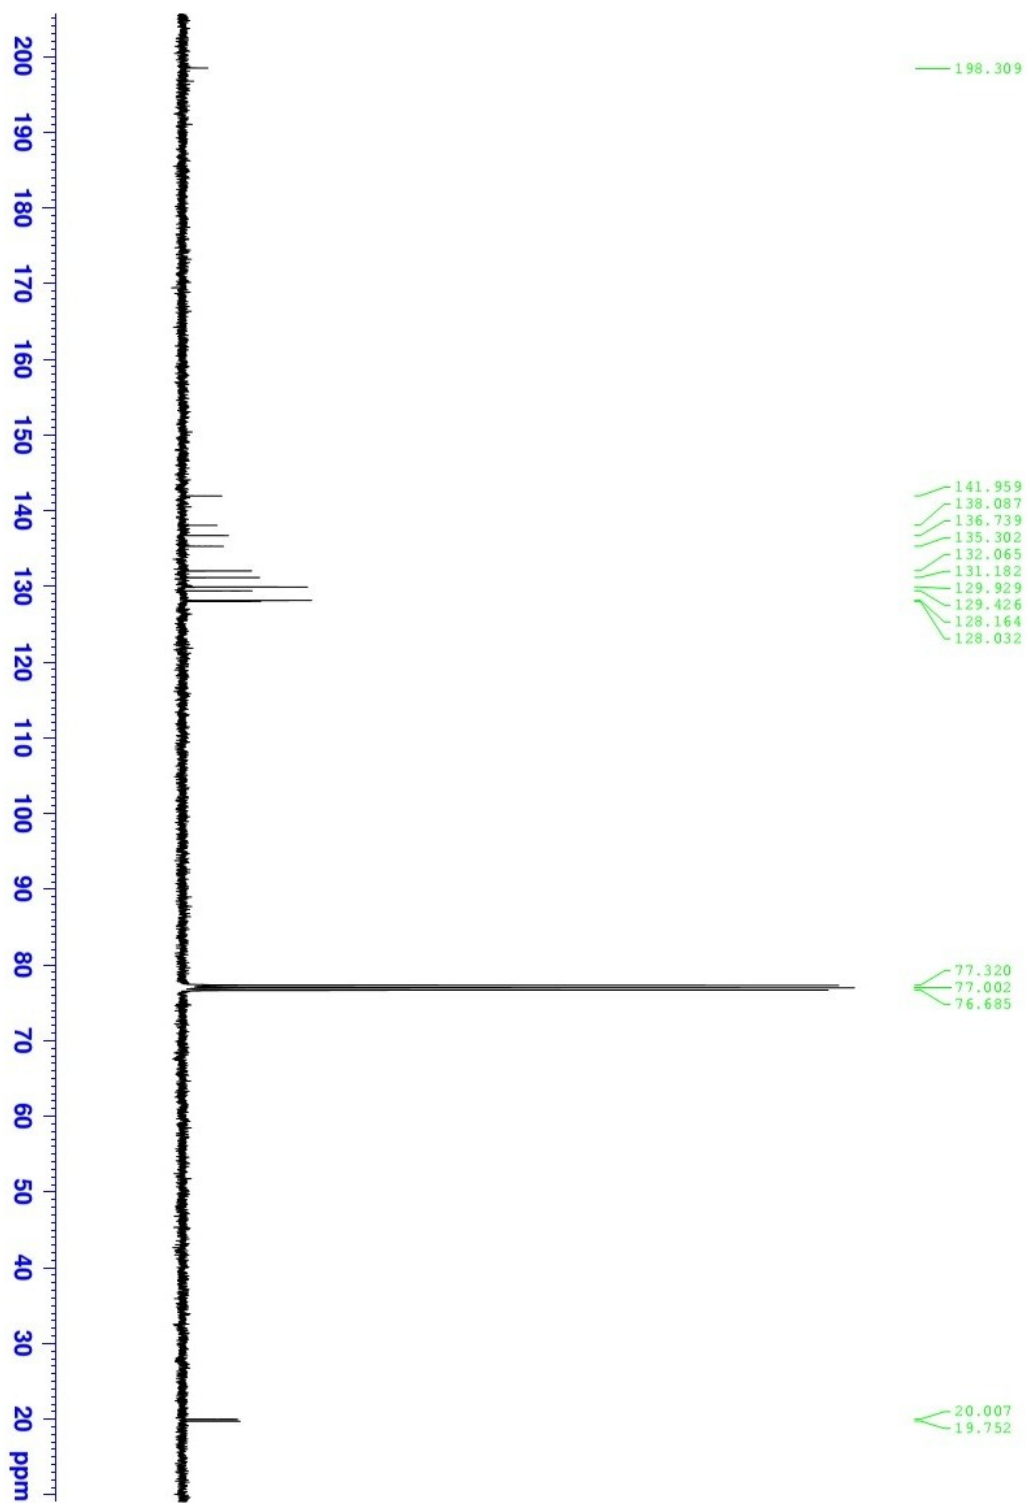

<sup>13</sup>C NMR of Compound 3ah

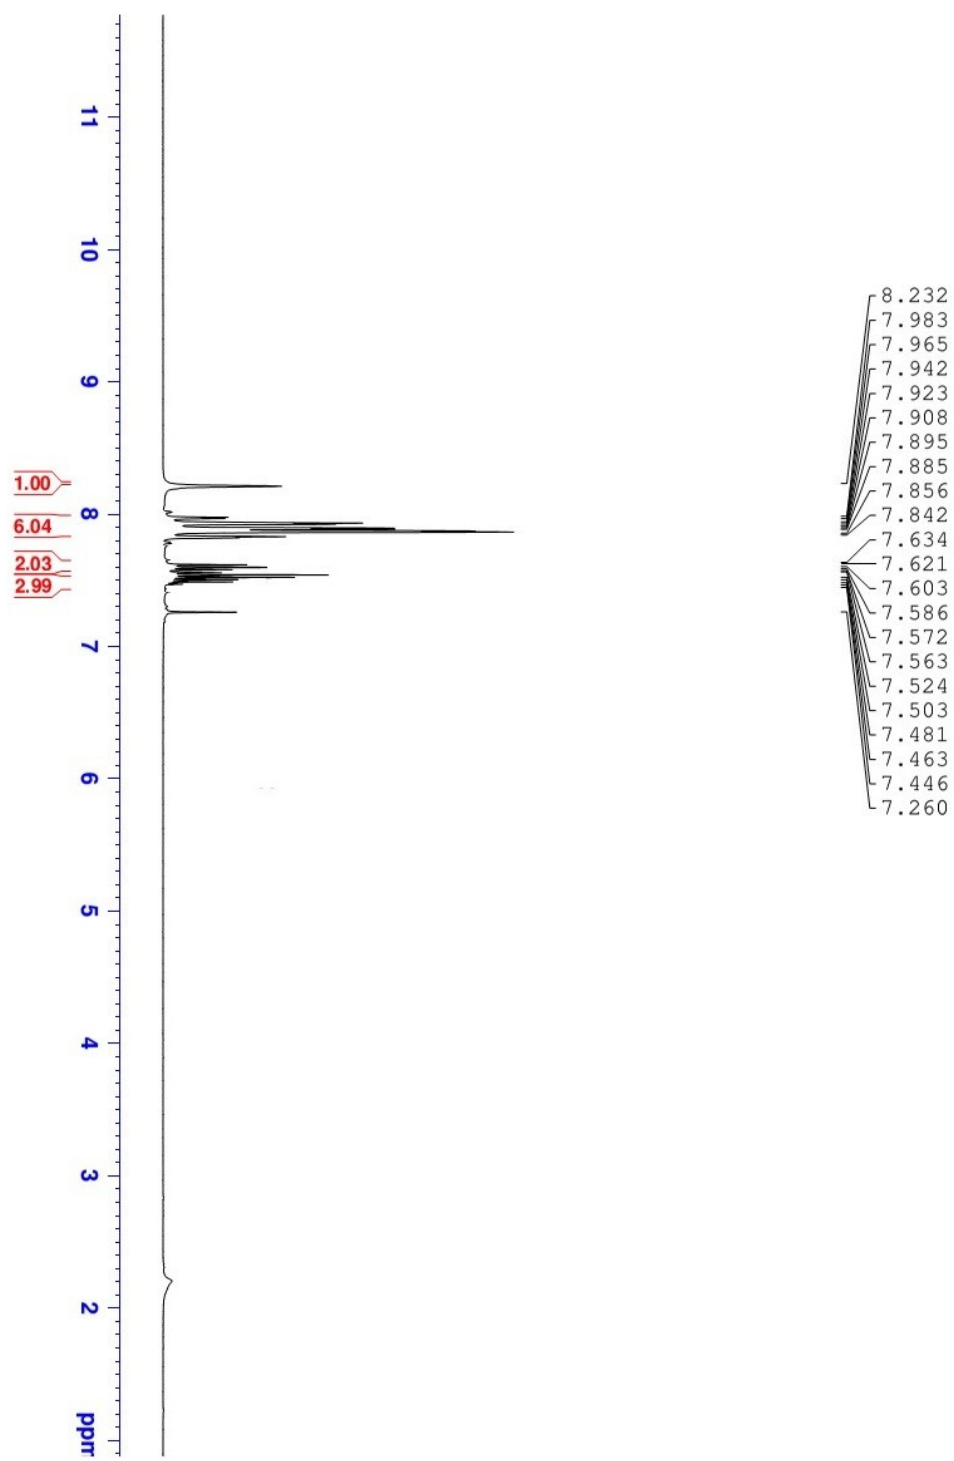

$^1\text{H}$  NMR of Compound 3ai

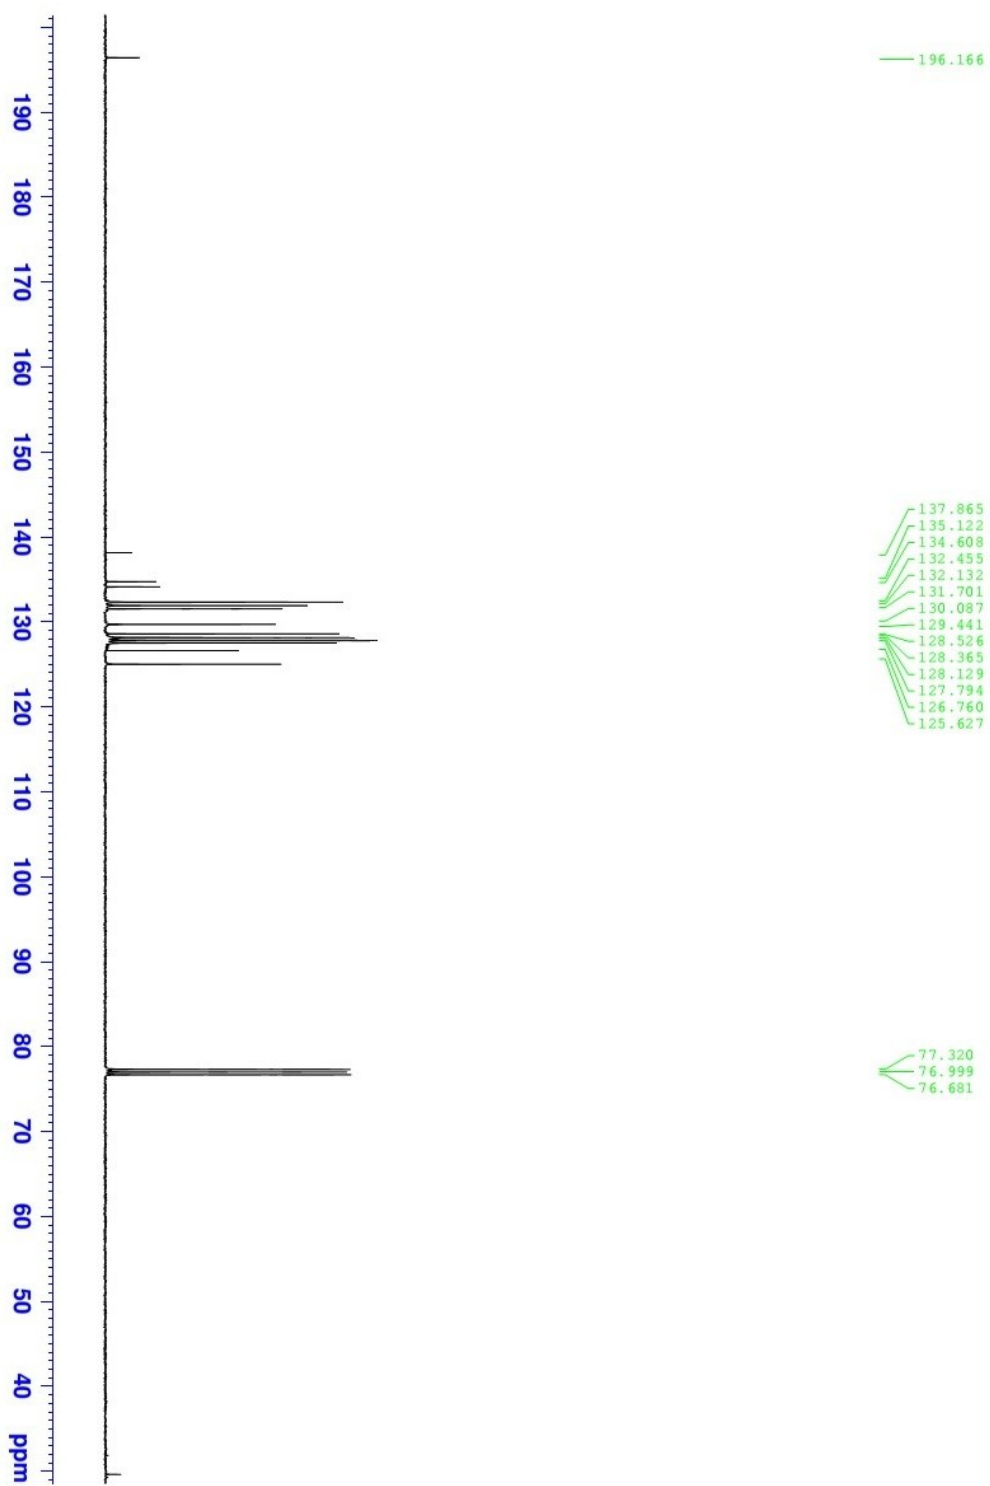

<sup>13</sup>C NMR of Compound 3ai

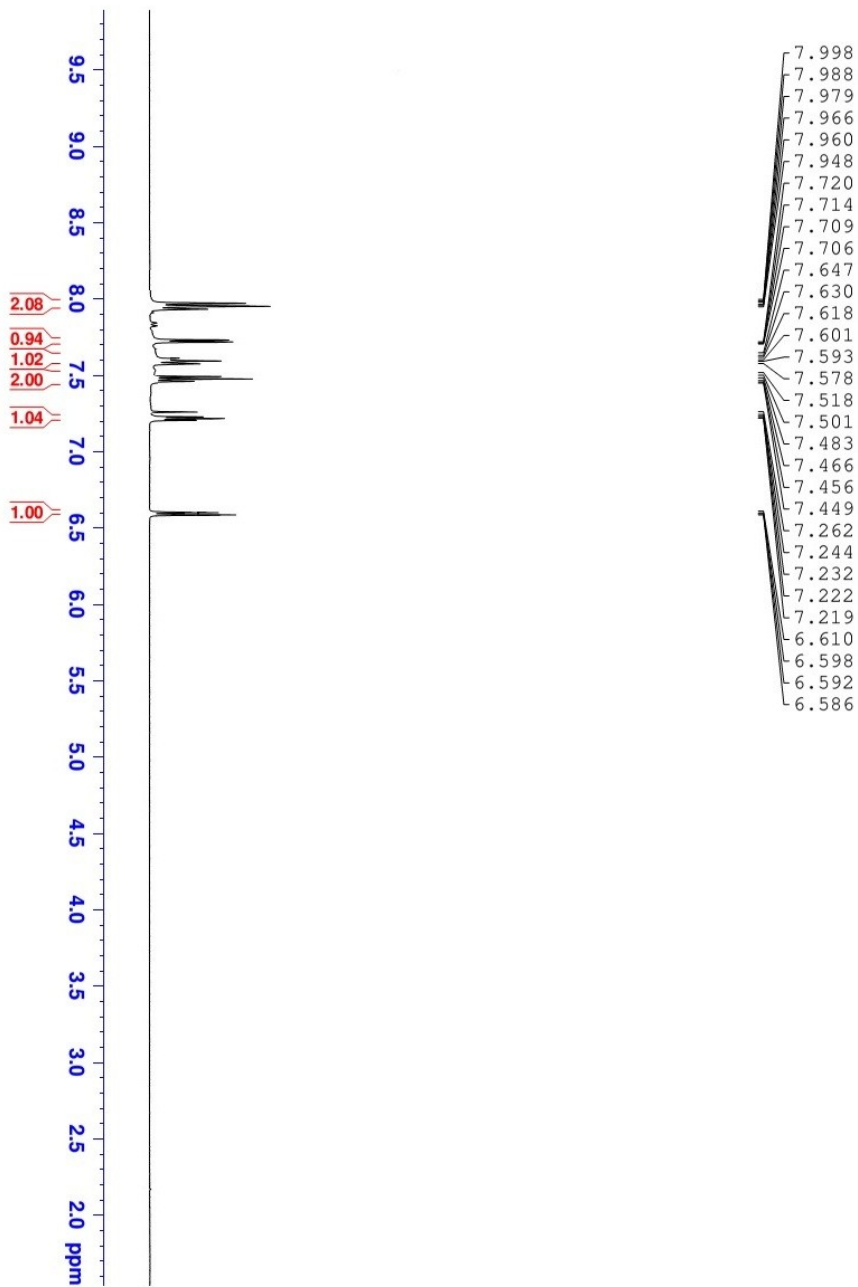

**<sup>1</sup>H NMR of Compound 3aj**

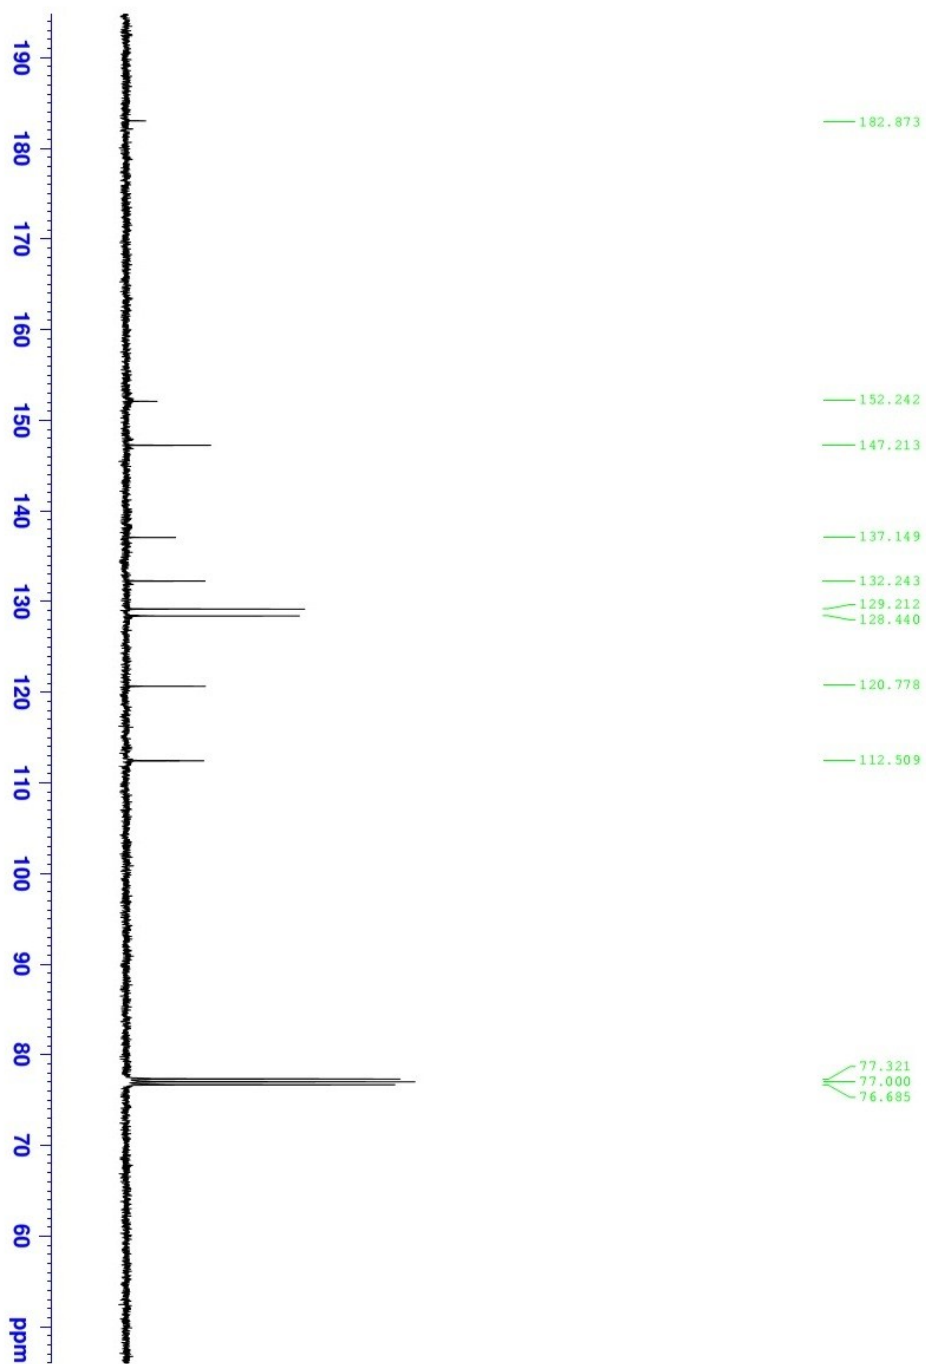

$^{13}\text{C}$  NMR of Compound 3aj

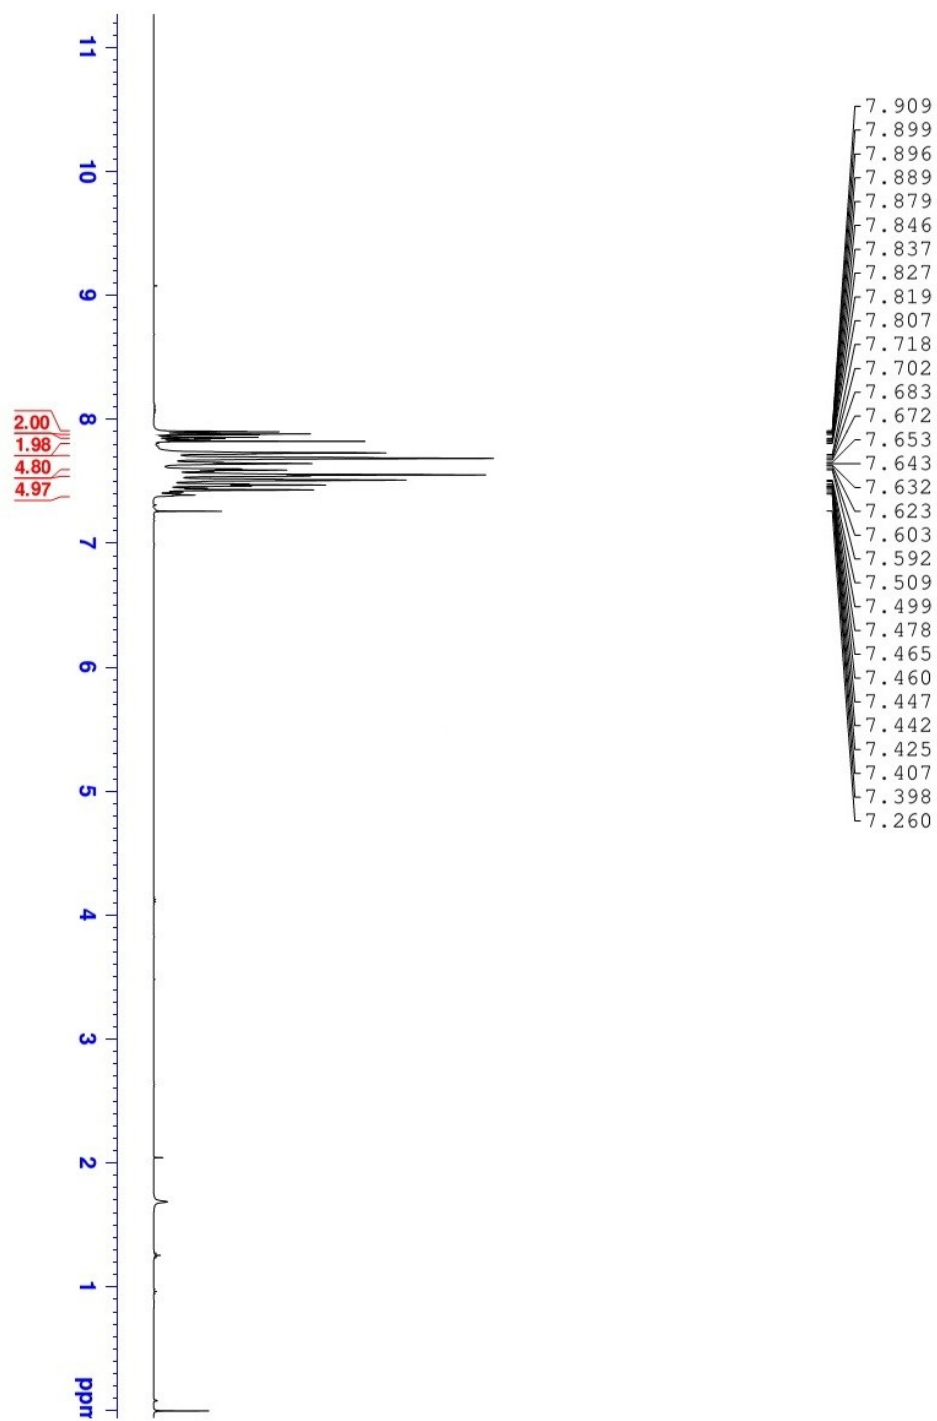

**<sup>1</sup>H NMR of Compound 3ca**

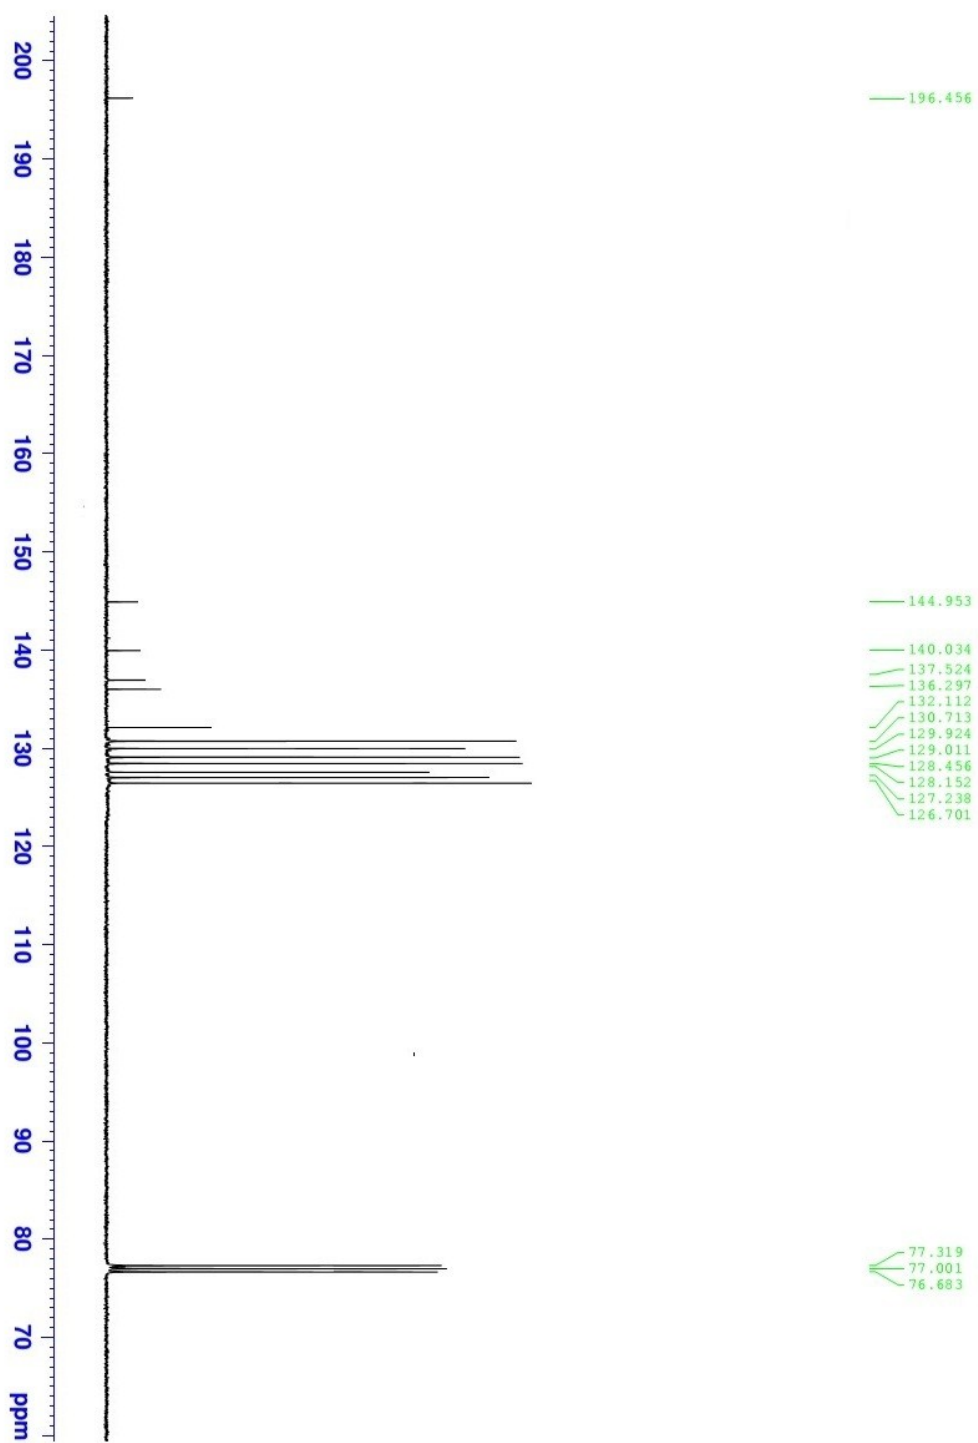

$^{13}\text{C}$  NMR of Compound 3ca

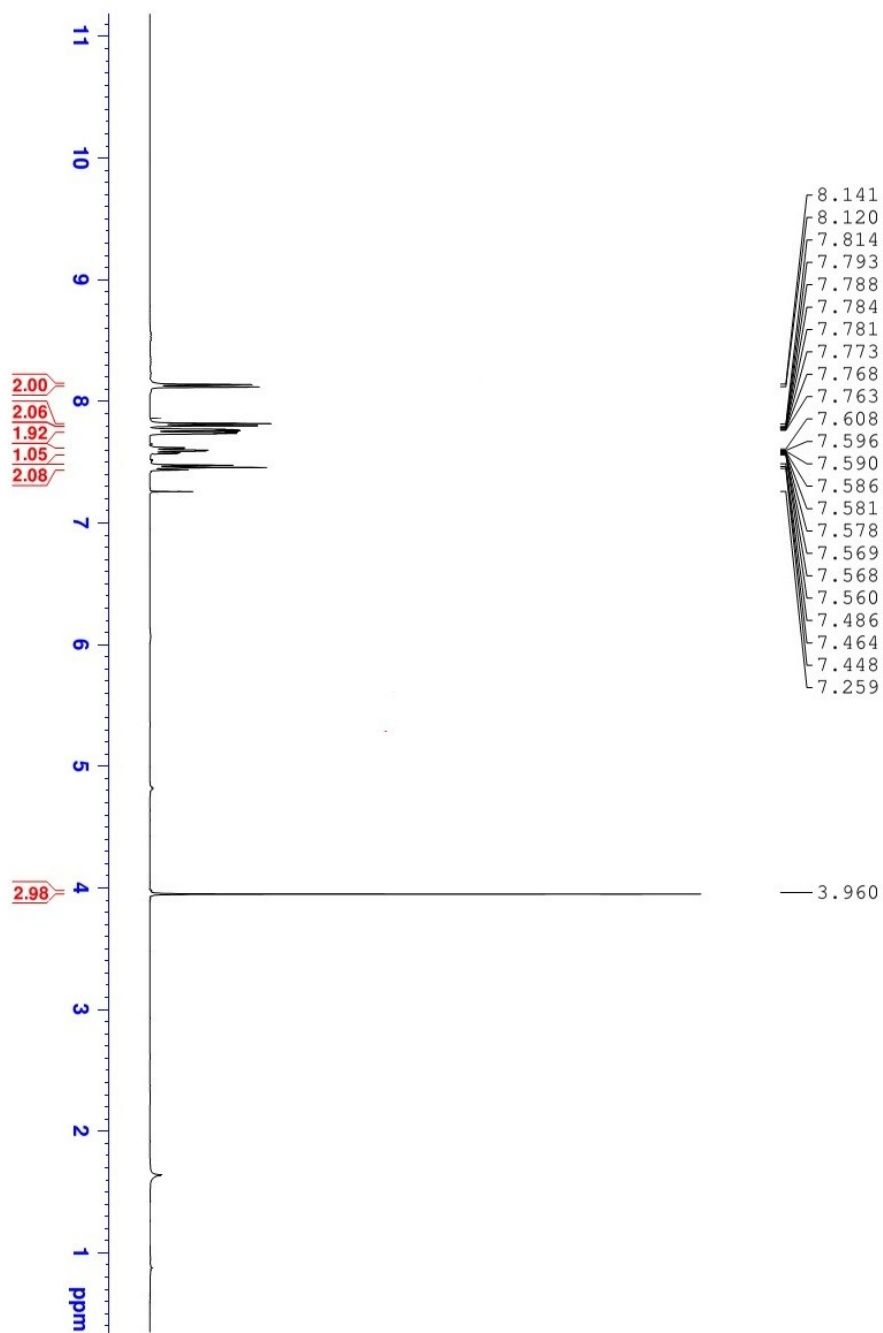

<sup>1</sup>H NMR of Compound 3da



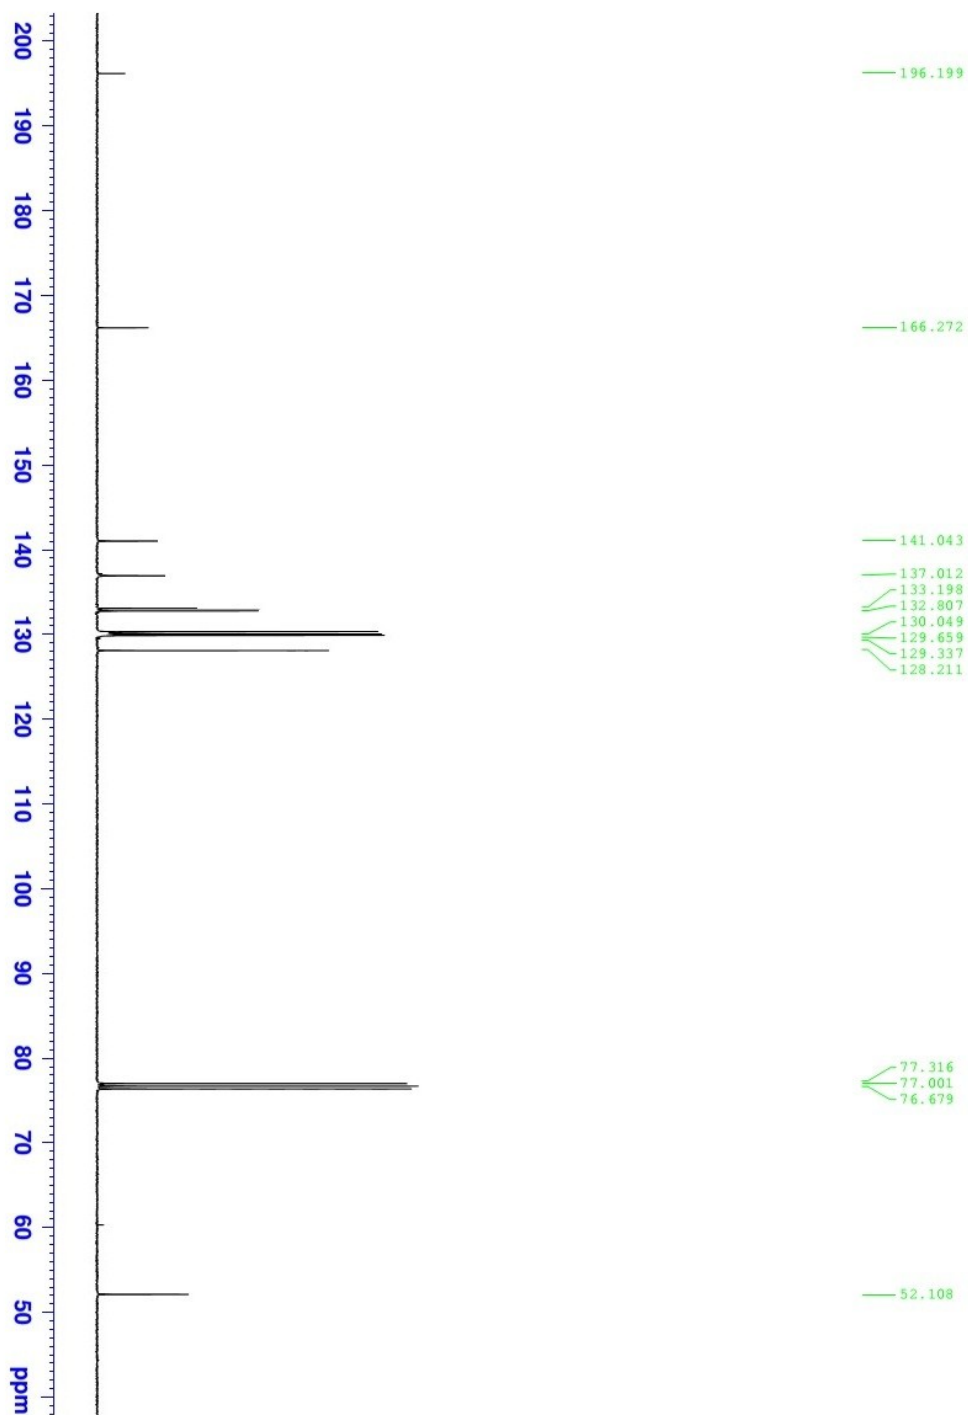

$^{13}\text{C}$  NMR of Compound 3da

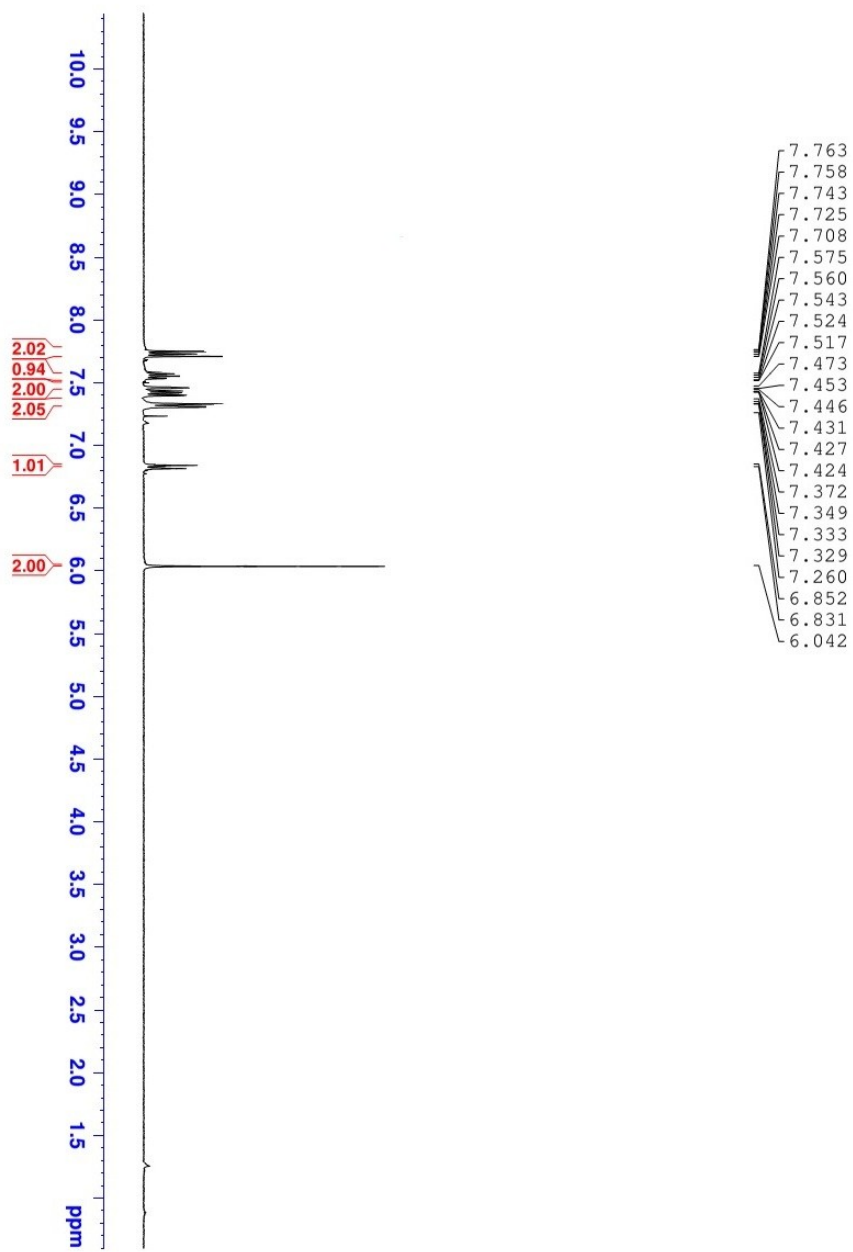

<sup>1</sup>H NMR of Compound 3ea

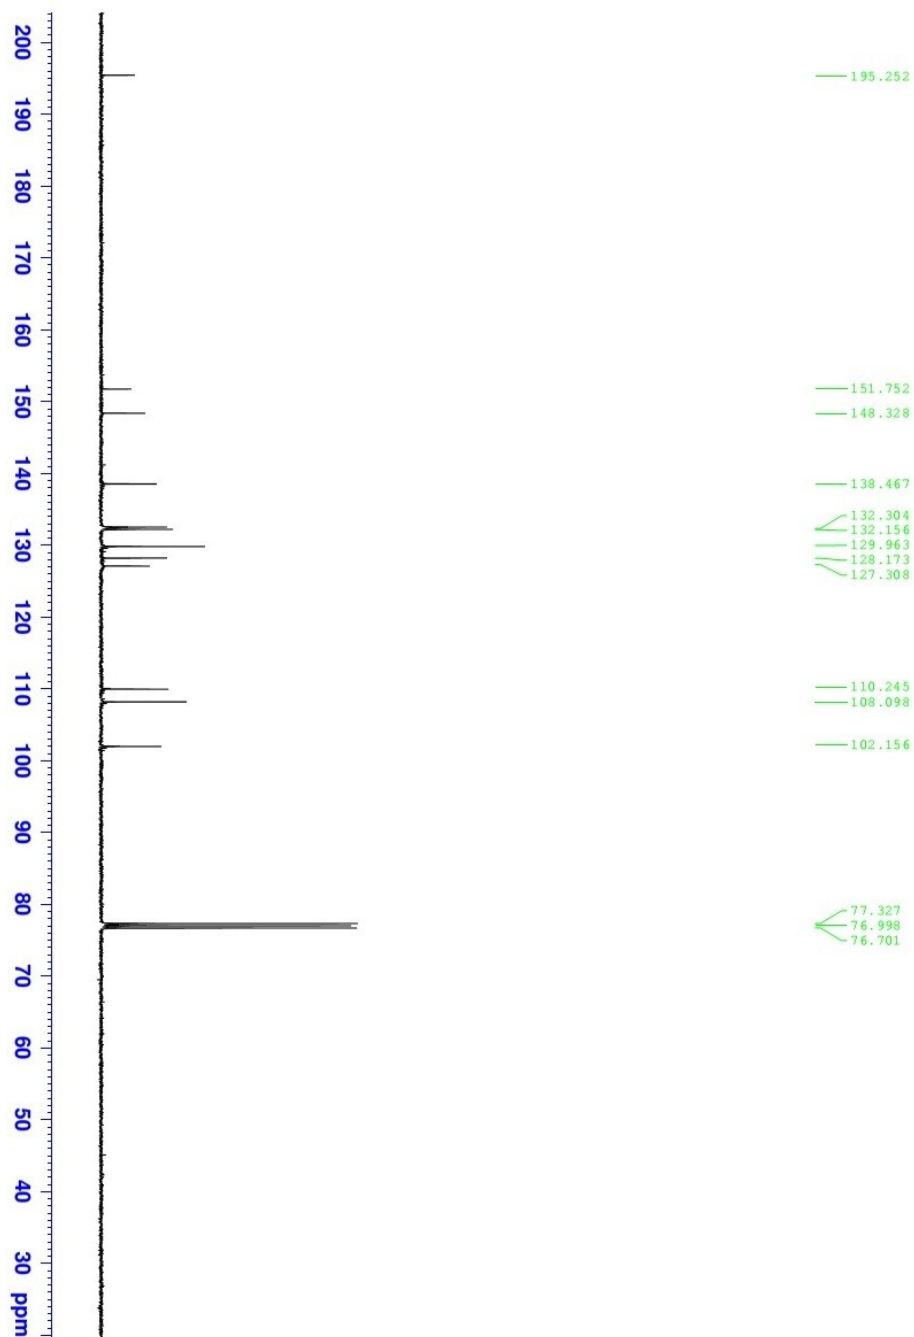

**<sup>13</sup>C NMR of Compound 3ea**

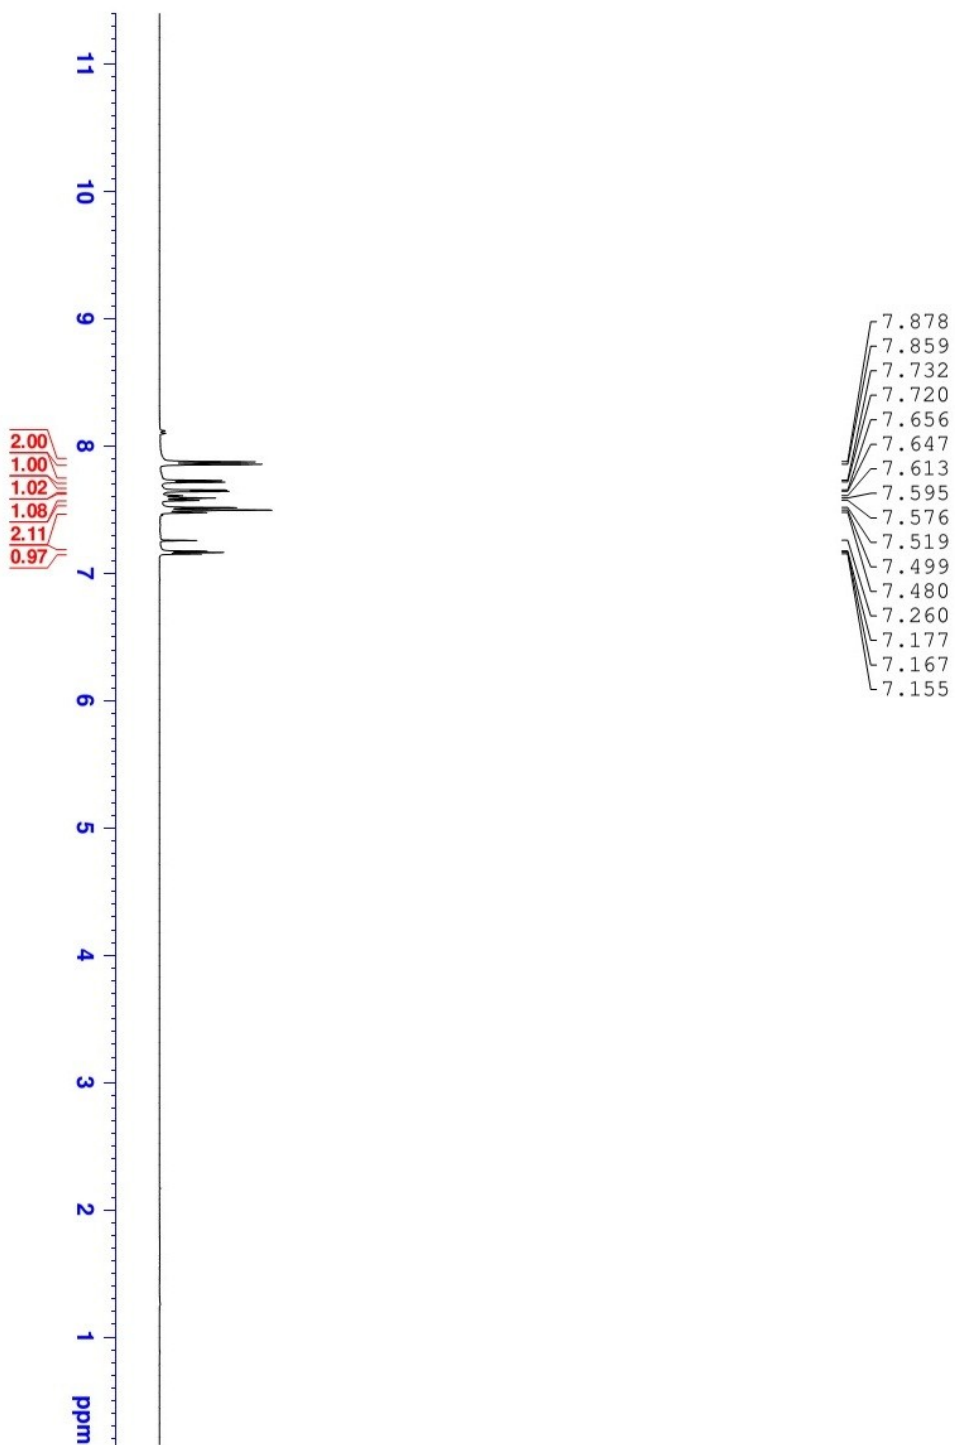

$^1\text{H}$  NMR of Compound 3fa

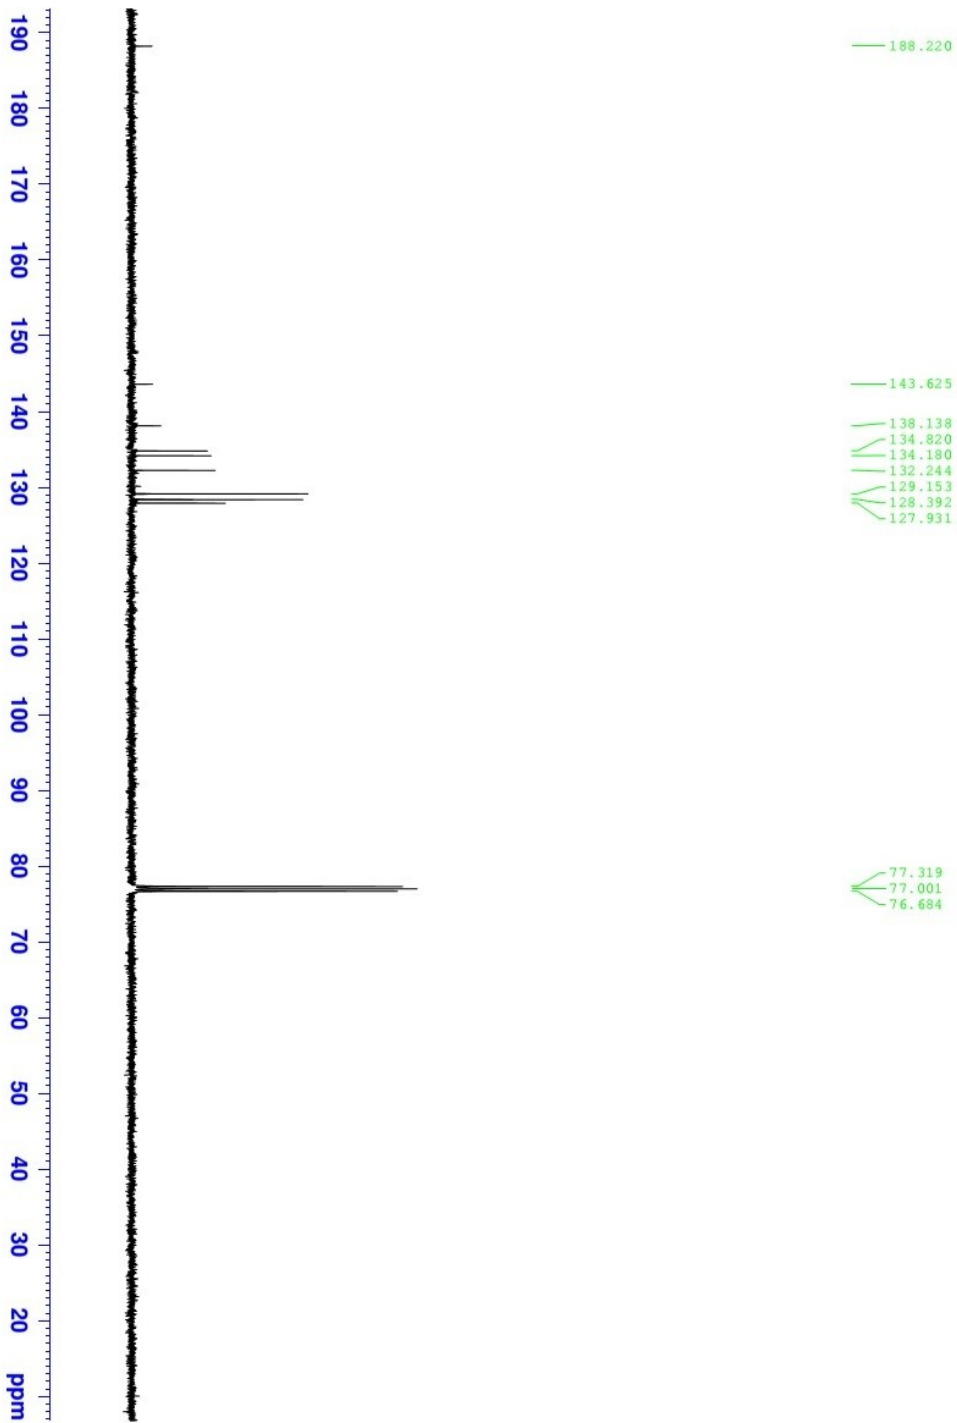

<sup>13</sup>C NMR of Compound 3fa

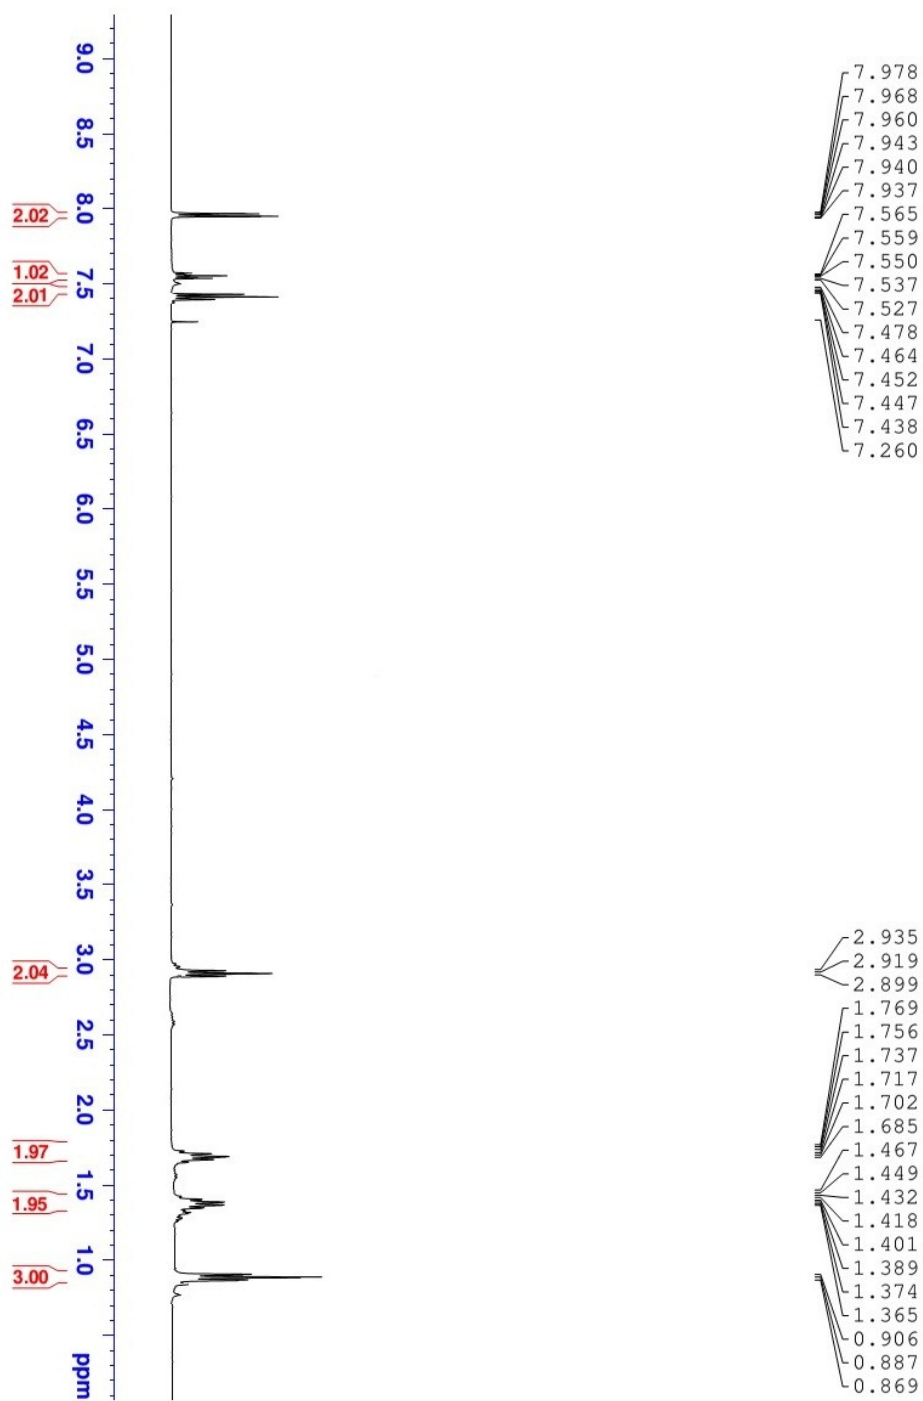

**<sup>1</sup>H NMR of Compound 3ga**

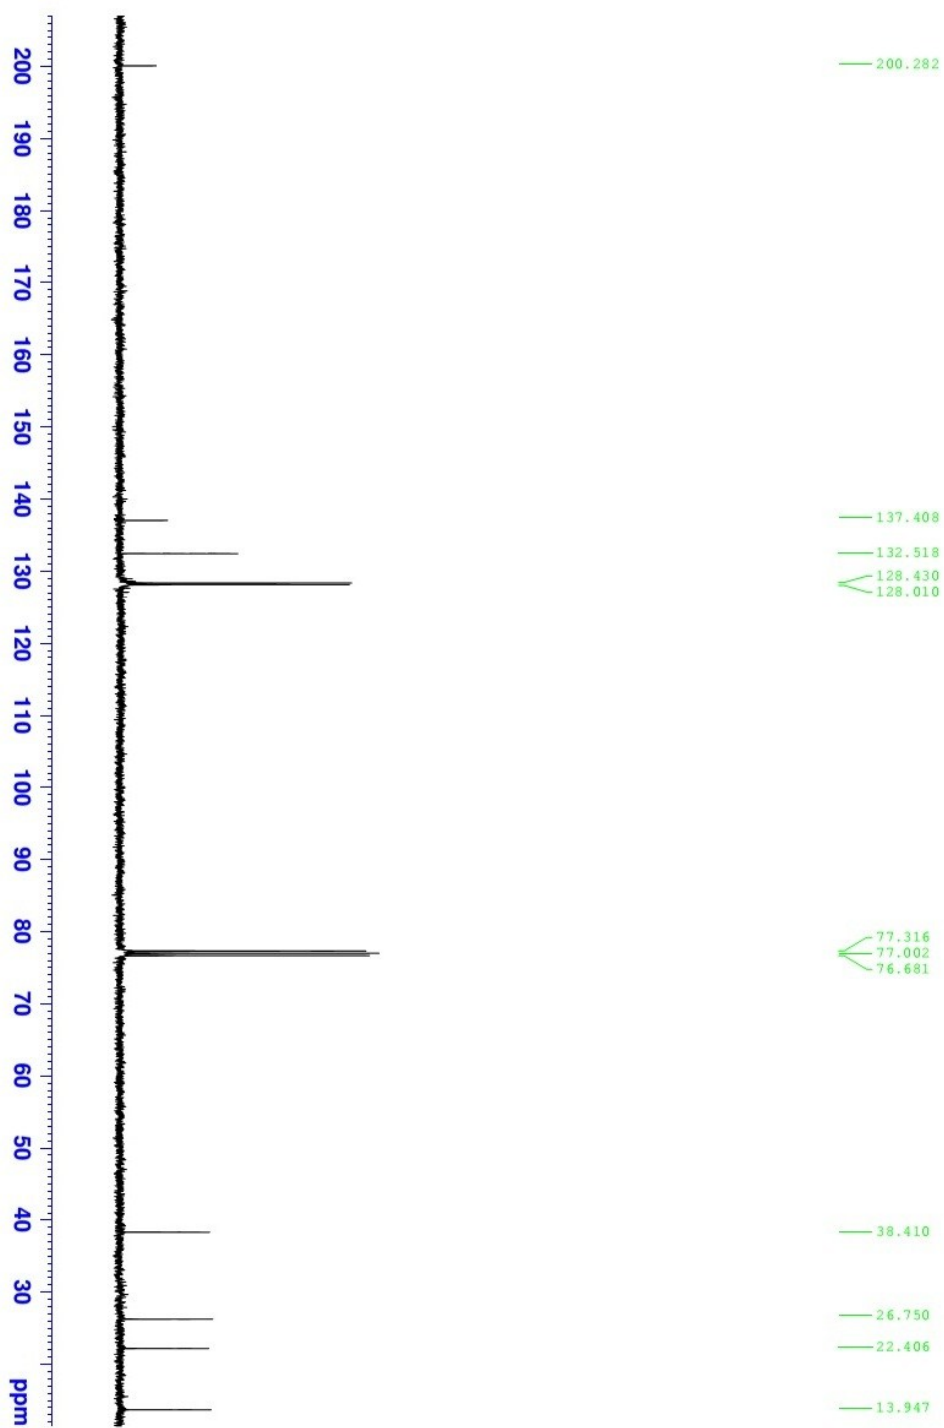

$^{13}\text{C}$  NMR of Compound 3ga

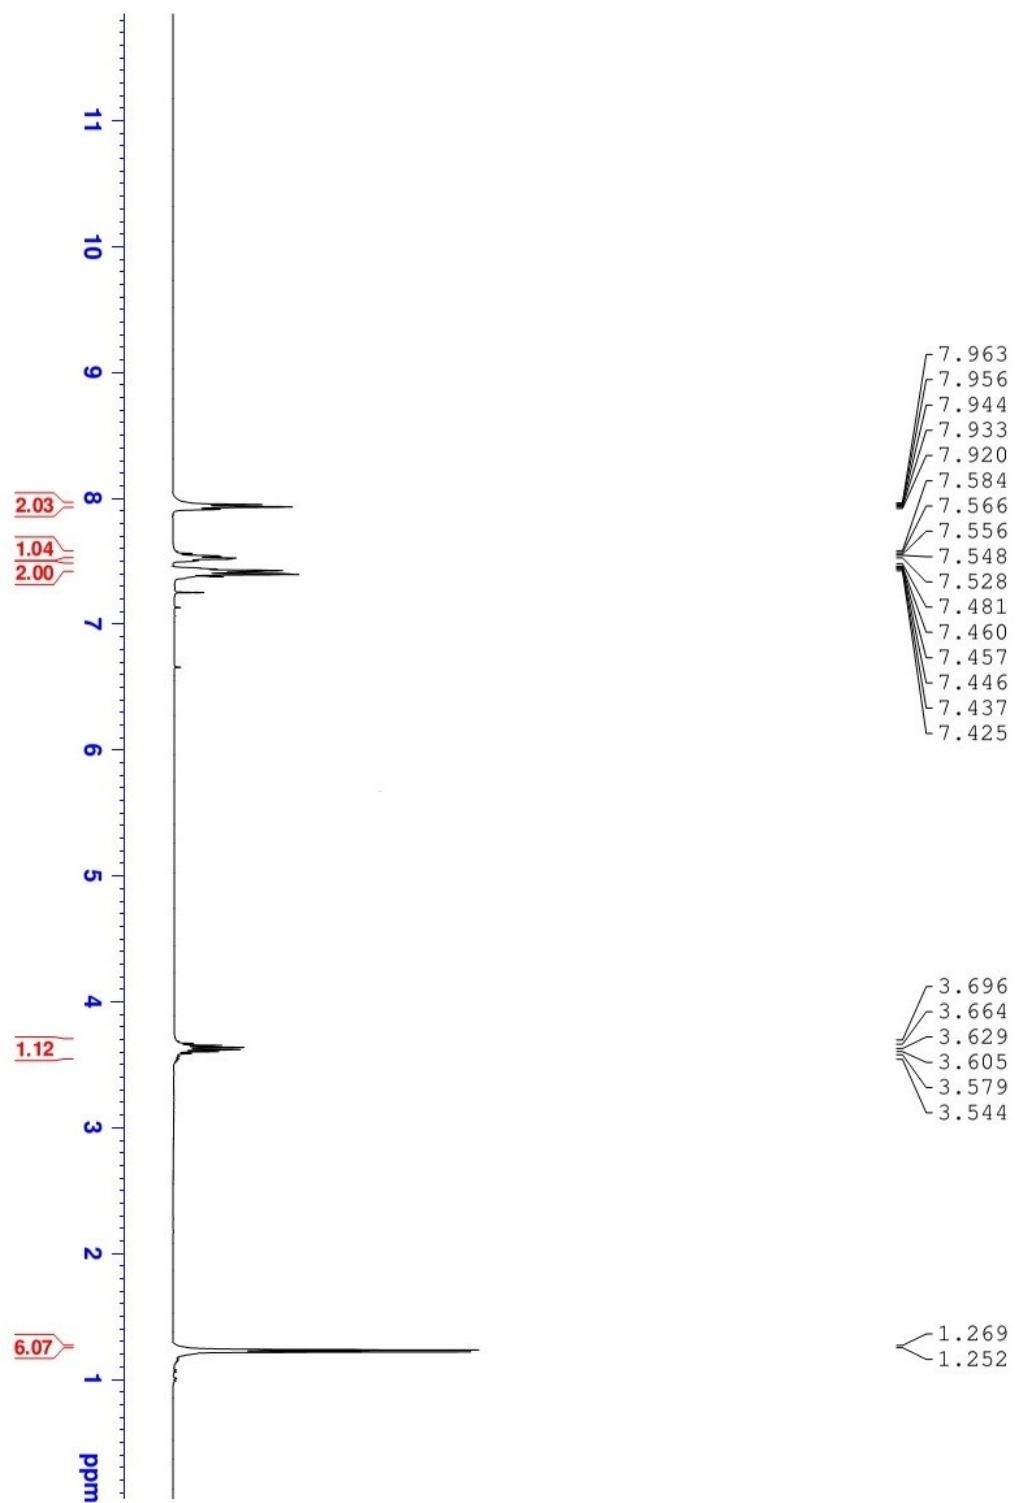

$^1\text{H}$  NMR of Compound 3ha



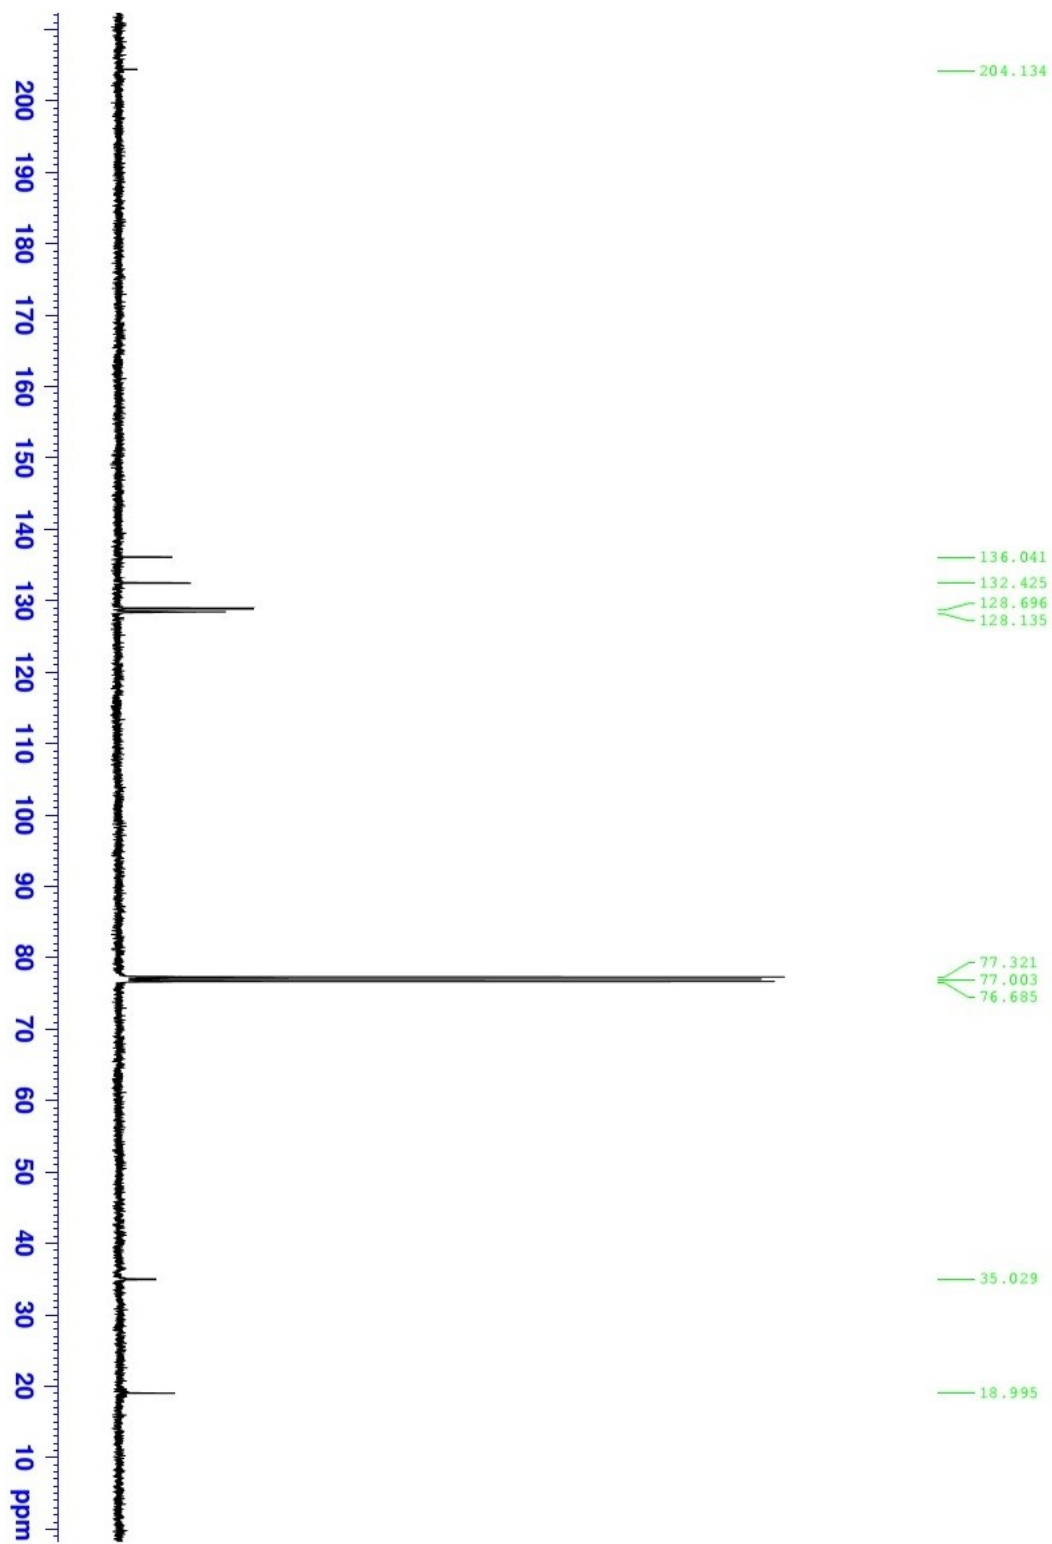

<sup>13</sup>C NMR of Compound 3ha

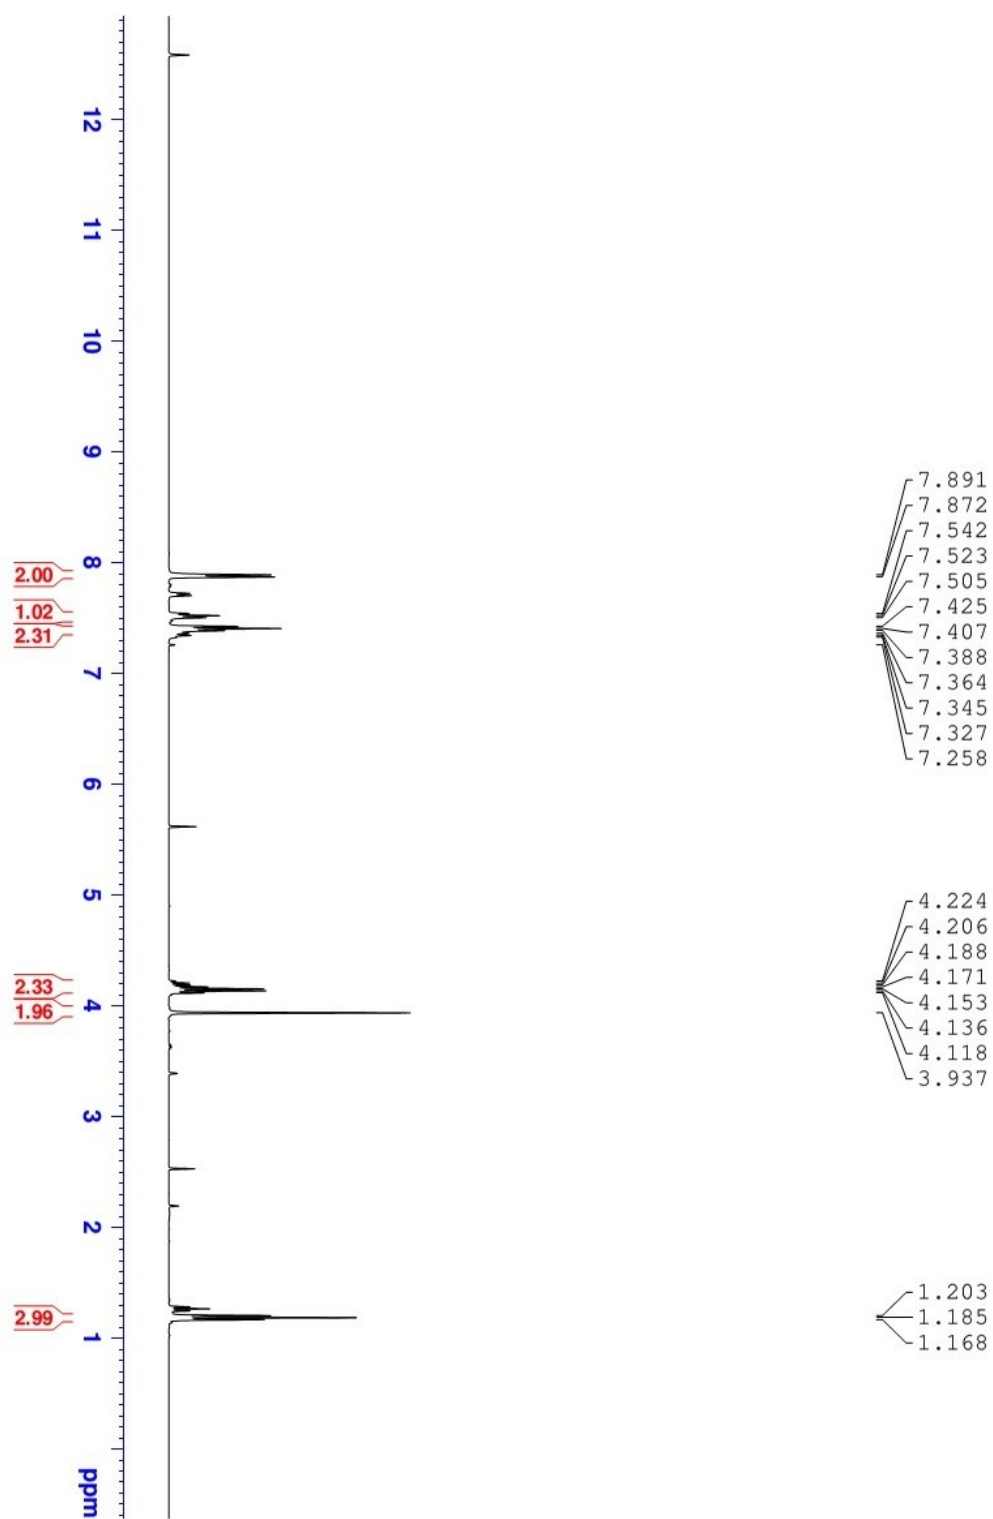

<sup>1</sup>H NMR of Compound 3ia

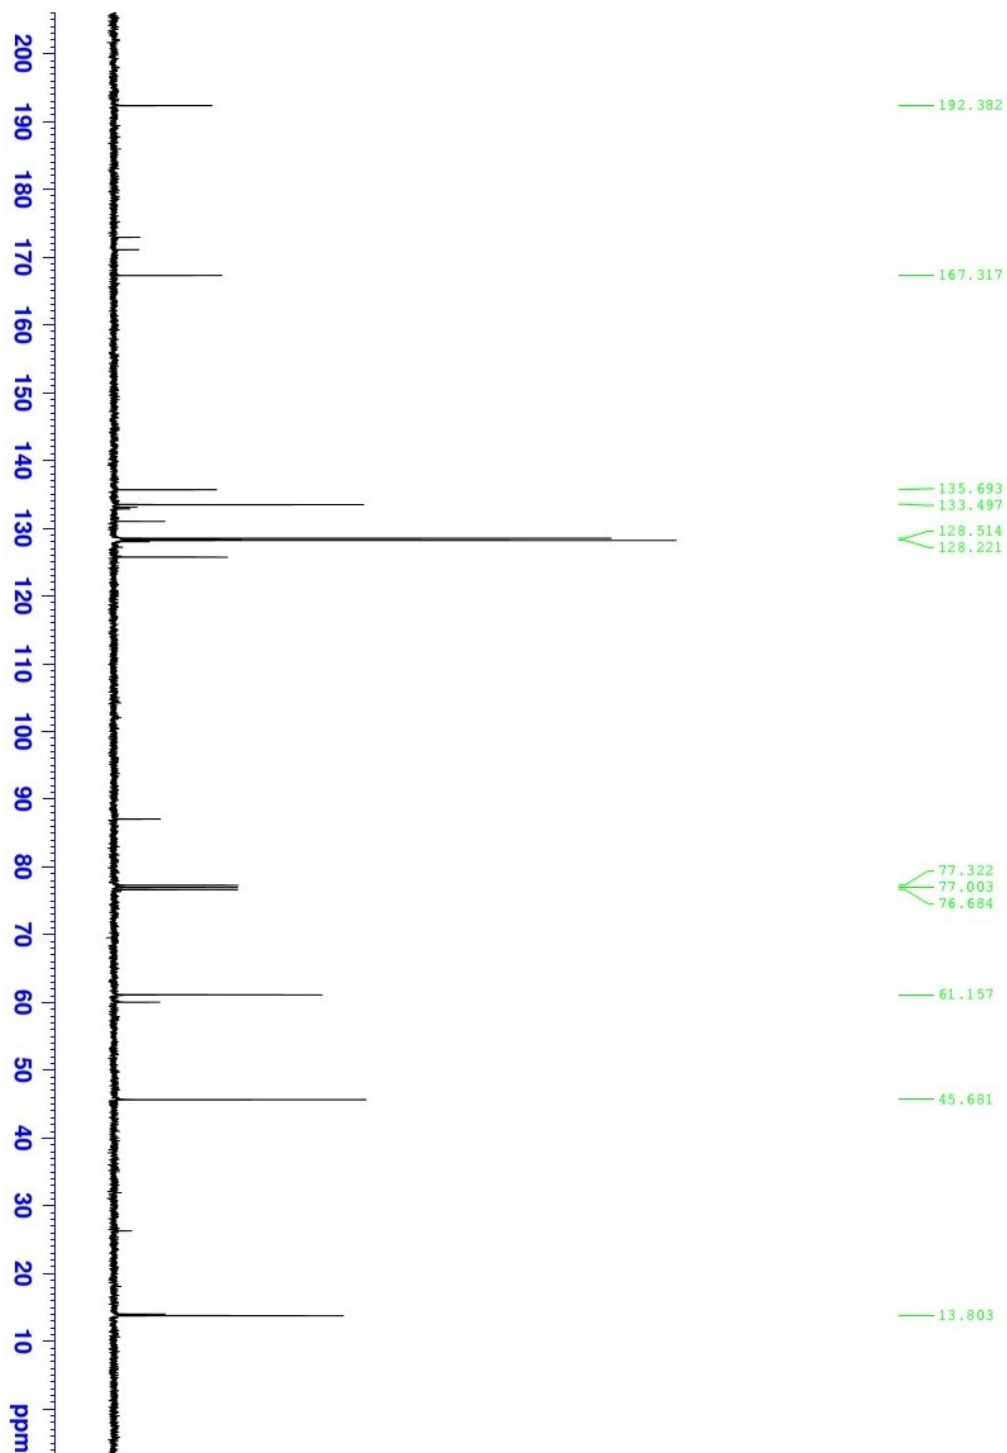

<sup>13</sup>C NMR of Compound 3ia
